# Supplementary material for: Isolation of mixed valence charge-neutral Ag12, and dicationic Ag10 nano-clusters stabilized by carbene-phosphaalkenides
Source: Royal Society of Chemistry journal article supplement (doi:10.1039/d4cc05628k), 2024-12-12
Supplement: d4cc05628k1.pdf [file d4cc05628k1.pdf]

## Supporting Information

### Isolation of Mixed Valence Charge-Neutral Ag<sub>12</sub>, and Dicationic Ag<sub>10</sub> Nano-Clusters Stabilized by Carbene-Phosphaalkenides

Maria Francis,<sup>a‡</sup> Asutosh Patra,<sup>a‡</sup> Farsana Abdul Salam,<sup>a</sup> Siriyara Jagannatha Prathapa,<sup>b</sup> and Sudipta Roy<sup>\*a</sup>

<sup>a</sup> Department of Chemistry, Indian Institute of Science Education and Research (IISER) Tirupati, Tirupati 517507, India. **Email:** roy.sudipta@iisertirupati.ac.in

<sup>b</sup> Bruker India Scientific Pvt. Ltd.

#### Contents:

|                                                  |         |
|--------------------------------------------------|---------|
| <b>S1:</b> General Remarks .....                 | S2      |
| <b>S2:</b> Detailed Syntheses .....              | S3-S4   |
| <b>S3:</b> Cyclic Voltammetry (CV) Studies ..... | S4-S5   |
| <b>S4:</b> EPR Studies .....                     | S6-S8   |
| <b>S5:</b> Mass Spectra .....                    | S9      |
| <b>S6:</b> UV-Vis Spectrum .....                 | S10     |
| <b>S7:</b> X-Ray Crystallographic Analysis ..... | S11-S25 |
| <b>S8:</b> Computational Details .....           | S25-S54 |
| <b>S9:</b> TGA Analyses .....                    | S54     |
| <b>S10:</b> XPX Analyses .....                   | S55-S56 |
| <b>S11:</b> References .....                     | S57-S58 |

## S1. General Remarks

All manipulations were performed using either standard Schlenk line techniques under inert argon atmosphere or in an argon-filled MBraun Eco Plus glove box, where O<sub>2</sub> and H<sub>2</sub>O levels were kept below 0.1 ppm. All glassware were oven-dried (150 °C) prior to use. Solvents obtained from an MBraun Solvent Purification System (SPS) were further dried by standard methods of refluxing with Na/K alloy for two days, followed by vacuum distillation over 4 Å molecular sieves under argon. Cyclic alkyl(amino) carbene (cAAC) salts,<sup>1</sup> free cAACs,<sup>1</sup> cAAC=P-Cl,<sup>2</sup> cAAC=PK<sup>3</sup> and [cAAC=P-B(N<sup>i</sup>Pr<sub>2</sub>)<sub>2</sub>]<sup>4</sup> were synthesized according to the literature reported procedures. <sup>1</sup>H, <sup>13</sup>C {<sup>1</sup>H}, and <sup>31</sup>P NMR spectra were recorded on Bruker Neo Avance 400 MHz. Melting points were measured in sealed glass tubes on a Digital Stuart Melting Point Apparatus. EPR spectra were obtained using an X-band (8.75-9.65GHz) JEOL Model JES FA200 EPR spectrometer at 293 K. UV-visible absorption spectra were recorded using an Agilent Cary-60 UV-Vis Spectrophotometer. The ESI-MS of the reported clusters were recorded on Agilent Technologies Q-TOF 6545 instruments. Single crystal X-Ray diffraction data were collected on a Bruker D8 venture Apex4 HEED diffractometer, with helios optics mono-chromated Mo-K $\alpha$  ( $\lambda = 0.71073 \text{ \AA}$ ) radiation at 100 K. The data was integrated using SAINT PLUS and absorption correction was done using multi-scan absorption correction method (SADABS). Thermogravimetric analysis (TGA) of the samples were performed on TA Instruments model-Q500 by loading 4.65 mg of sample onto a pan and heated from room temperature to 900 °C at a heating rate of 20 °C/min under the flow of nitrogen at the flow rate of 60 mL/min. The X-ray photo-electron spectroscopy (XPS) measurements were carried out using a Thermo Scientific K-ALPHA<sup>+</sup> X-ray photo-electron spectrometer using a mono-chromated Al K $\alpha$  radiation with 6mA beam current and 12 KV.

## S2. Detailed syntheses of the nano-clusters (NCs) 2 and 4

### Synthesis of neutral NC [(Me<sub>2</sub>-cAAC=P)<sub>6</sub>Ag<sub>12</sub>Cl<sub>3</sub>] (2)

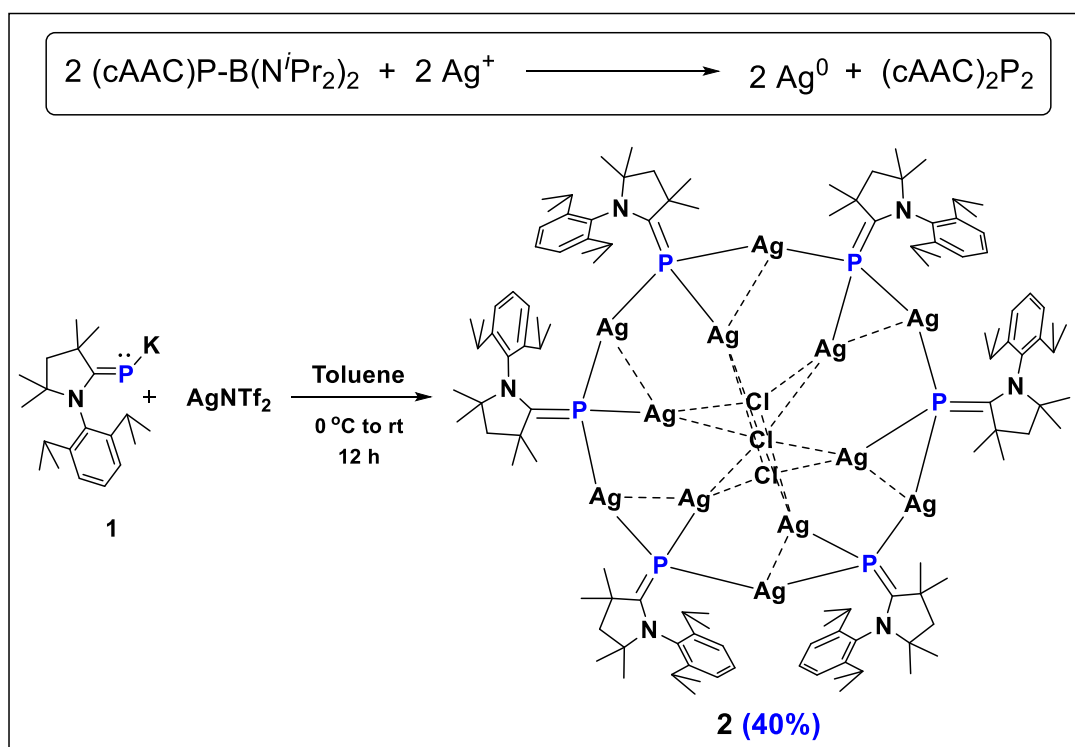

**Scheme S1.** Synthesis of the neutral NC [(Me<sub>2</sub>-cAAC=P)<sub>6</sub>Ag<sub>12</sub>Cl<sub>3</sub>] (2).

To an oven dried 50 mL Schlenk flask, [Me<sub>2</sub>-cAAC=PK] (1) (190 mg, 0.534 mmol, 1 equiv) was taken, and to another 100 mL Schlenk flask, AgNTf<sub>2</sub> (142.5 mg, 0.367 mmol, 1.45 equiv) was taken. 15 mL of anhydrous toluene was added separately in each of the flasks, and stirred until clear a solution is obtained. Both the flasks were cooled to 0 °C (using liquid nitrogen/iso-propanol bath) and the AgNTf<sub>2</sub> solution was added to the flask containing [Me<sub>2</sub>-cAAC=PK] through cannula under constant stirring. After this, the temperature was maintained at 0 °C for 1 h, then the reaction mixture was brought slowly to room temperature (rt) and allowed to stir for another 12 h. The color of the reaction mixture changed from orange to dark brownish-red with the formation of reddish-brown precipitate. The reaction mixture was dried, given wash with *n*-hexane, filtered, and evaporated the solvent from filtrate to complete dryness under reduced pressure. The crystalline solid was dissolved in anhydrous DCM to produce dark reddish-brown solution, which was concentrated up to 1 mL under reduced pressure and stored for crystallization in a freezer kept at -40 °C. After one-

week, dark red block shaped crystals of  $[(\text{Me}_2\text{-cAAC}=\text{P})_6\text{Ag}_{12}\text{Cl}_3]$  (**2**) were obtained (65 mg, 40%).

**Decomposition point of 2:** 205-207 °C.

### Synthesis of mono-cationic NC $[(\text{Me}_2\text{-cAAC}=\text{P})_6\text{Ag}_{10}](\text{NTf}_2)_2$ (**4**)

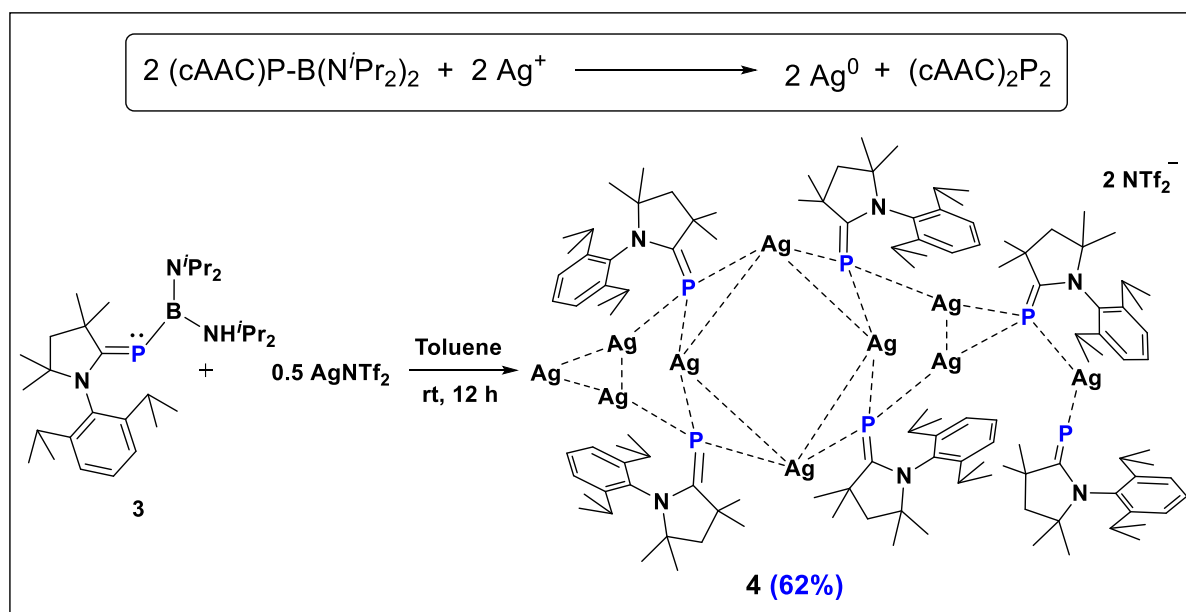

**Scheme S2.** Synthesis of NC  $[(\text{Me}_2\text{-cAAC}=\text{P})_6(\text{Ag})_{10}](\text{NTf}_2)_2$  (**4**).

To an oven-dried 100 mL Schlenk flask,  $[(\text{Me}_2\text{-cAAC}=\text{P}-\text{B}(\text{N}^i\text{Pr})_2)_2]$  (**3**) (150 mg, 0.28 mmol, 1 equiv), and  $\text{AgNTf}_2$  (58.60 mg, 0.19 mmol, 0.5 equiv) were taken. Added 10 mL of anhydrous toluene, and stirred at rt for 12 h. The reaction color changed from golden-yellow to brownish-red with the formation of greenish-brown precipitate. The reaction mixture was filtered, and the greenish-brown colored residue was completely dried under reduced pressure. The residue was then further dissolved in anhydrous DCM to obtain a greenish-yellow color solution, which was further concentrated up to 1-2 mL under reduced pressure, and stored for crystallization at 0 °C to obtain the yellow block shaped crystals of  $[(\text{Me}_2\text{-cAAC}=\text{P})_6\text{Ag}_{10}](\text{NTf}_2)_2$  (**4**) in 62% yield (95 mg).

**Note:** The redox non-innocent  $(\text{cAAC}=\text{P})^-$  ligands are *in situ* generated by the reaction of  $\text{AgNTf}_2$  with the boryl-phosphaalkene  $(\text{cAAC})\text{P-B}(\text{N}^i\text{Pr})_2$  (**3**) via the cleavage of the P–B bond with the help of triflate anion ( $\text{OTf}^-$ ), which acts as a weak nucleophile. The equivalent numbers of the *in situ* generated  $(\text{cAAC})\text{P}^-$  anions are oxidized to produce the corresponding radical  $\text{Me}_2\text{-cAACP}^\cdot$ ,<sup>3</sup> which undergoes dimerization to produce the

bis-phosphinidene (Me<sub>2</sub>-cAAC)<sub>2</sub>P<sub>2</sub>, leading to the generation of Ag(0) atoms in solution for the formation of the mixed valence Ag<sup>0/I</sup> NCs. The formation of the corresponding cAAC-supported bis-phosphinidene (Me<sub>2</sub>-cAAC)<sub>2</sub>P<sub>2</sub> has been supported by the <sup>31</sup>P NMR spectroscopic measurements of the crude reaction mixture (55.1 ppm).

**Decomposition point of 4:** 165-167 °C.

### S3. Cyclic voltammetry (CV) studies of NCs 2 and 4.

The cyclic voltammetry (CV) studies of NCs 2, 4 have been performed at a Metrohm-Autolab204 Potentiostat. All experiments have been performed under argon atmosphere in deoxygenated and anhydrous DCM solution of 0.1 M [*n*-Bu<sub>4</sub>N]PF<sub>6</sub> or [*n*-Bu<sub>4</sub>N]PClO<sub>4</sub>. The setup consisted of a glassy carbon (GC) working electrode (WE), a Pt wire as the counter electrode (CE) and Ag wire as the reference electrode (RE). The recorded voltammograms have been referenced to the internal standard (Cp)<sub>2</sub>Fe/(Cp)<sub>2</sub>Fe<sup>+</sup>, which was added after the measurements.

#### S3.1. Cyclic voltammetry studies of [(Me<sub>2</sub>-cAAC=P)<sub>6</sub>Ag<sub>12</sub>Cl<sub>3</sub>] (2)

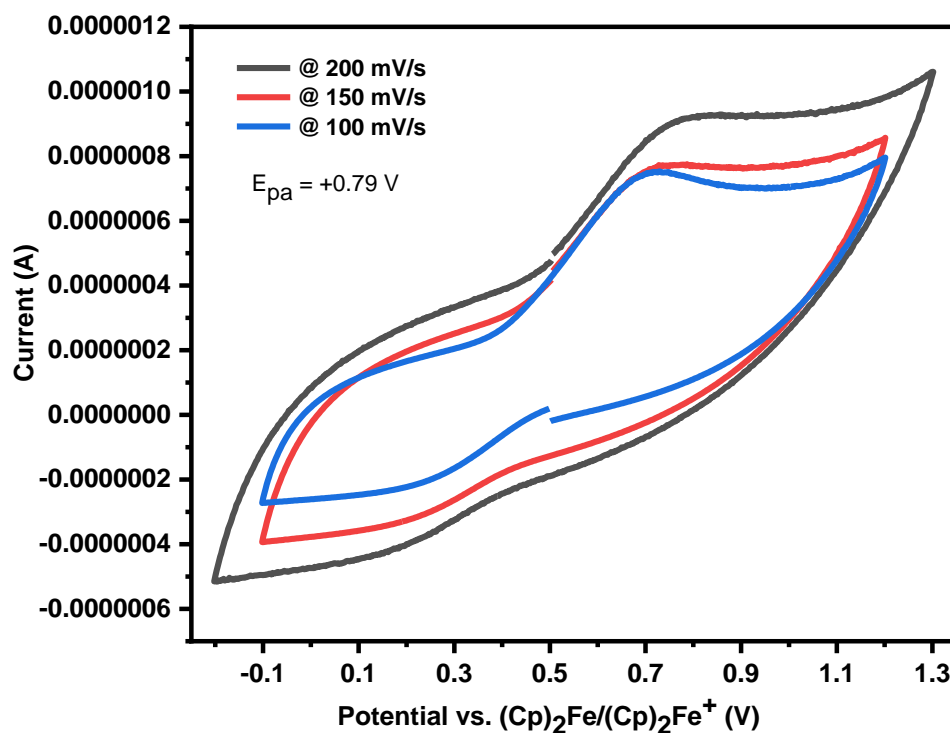

**Figure S1.** Cyclic voltammograms of 2 in DCM containing 0.1 M [*n*-Bu<sub>4</sub>N]PClO<sub>4</sub> as the electrolyte (CE: Pt, WE: GC, RE: Ag).

### S3.2. Cyclic voltammetry studies of $[(\text{Me}_2\text{-cAAC=P})_6\text{Ag}_{10}](\text{NTf}_2)_2$ (**4**)

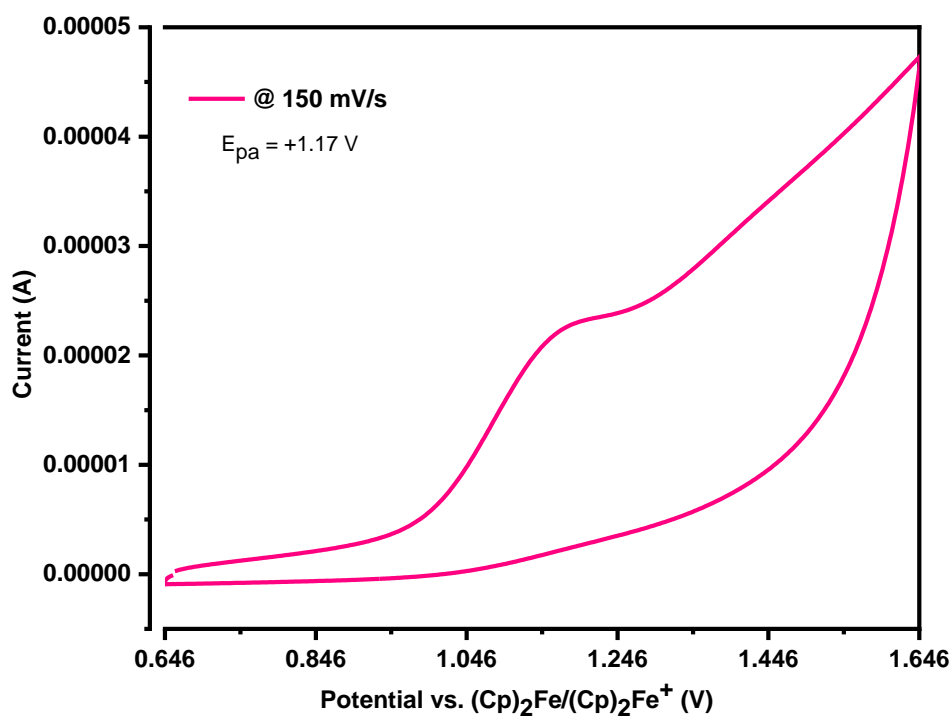

**Figure S2.** Cyclic voltammograms of **4** in DCM containing 0.1 M  $[n\text{-Bu}_4\text{N}]\text{PF}_6$  as the electrolyte (CE: Pt, WE: GC, RE: Ag).

### S4. EPR spectra of NCs **2**, **4**

The sample preparation was done under argon atmosphere using the glove box technique. 5 mg of each NCs **2**, **4** were taken in oven-dried sample vials and added distilled DCM (0.1 mL) separately. The light greenish-yellow color solutions were further diluted by the addition of more DCM and transferred to quartz capillary tubes. The capillary tubes with the complexes used for measurements were sealed adequately using silicon grease and melted wax to maintain the argon atmosphere throughout the experiment.

#### S4.1. EPR spectrum of [(Me<sub>2</sub>-cAAC=P)<sub>6</sub>Ag<sub>12</sub>Cl<sub>3</sub>] (2) in DCM

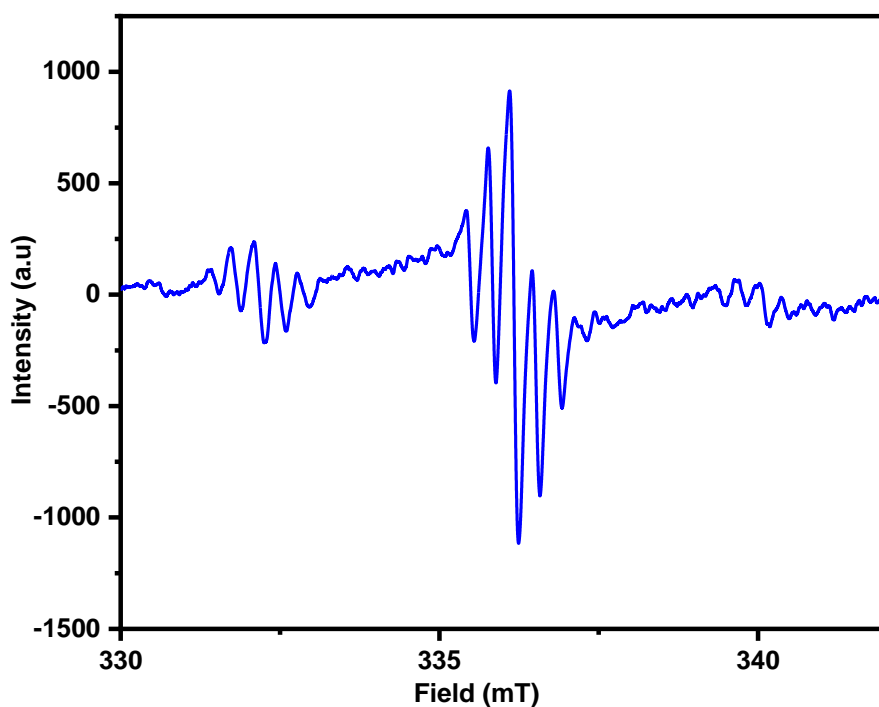

**Figure S3.** X-band ESR spectrum of [(Me<sub>2</sub>-cAAC=P)<sub>6</sub>Ag<sub>12</sub>Cl<sub>3</sub>] (2) in DCM at 293 K.

**Calculation of Lande factor (*g*):**

$$g = \frac{h\nu}{\mu_B H}$$

(*h* = Planck's constant, *ν* = Operating frequency,  $\mu_B$  = Bohr magneton, *H* = Magnetic field and *g* = Lande factor)

*h* = 6.626 × 10<sup>-34</sup> J.S, *ν* = 9.436 GHz = 9.436 × 10<sup>9</sup> Hz,  $\mu_B$  = Bohr magneton = 9.2740 × 10<sup>-24</sup> J/T, *H* = magnetic field = data on x-axis in T = 336.1708 mT = 336.1671 × 10<sup>-3</sup> T

$$g = 2.0056$$

#### S4.2. EPR spectrum of $[(\text{Me}_2\text{-cAAC}=\text{P})_6\text{Ag}_{10}](\text{NTf}_2)_2$ (4) in DCM

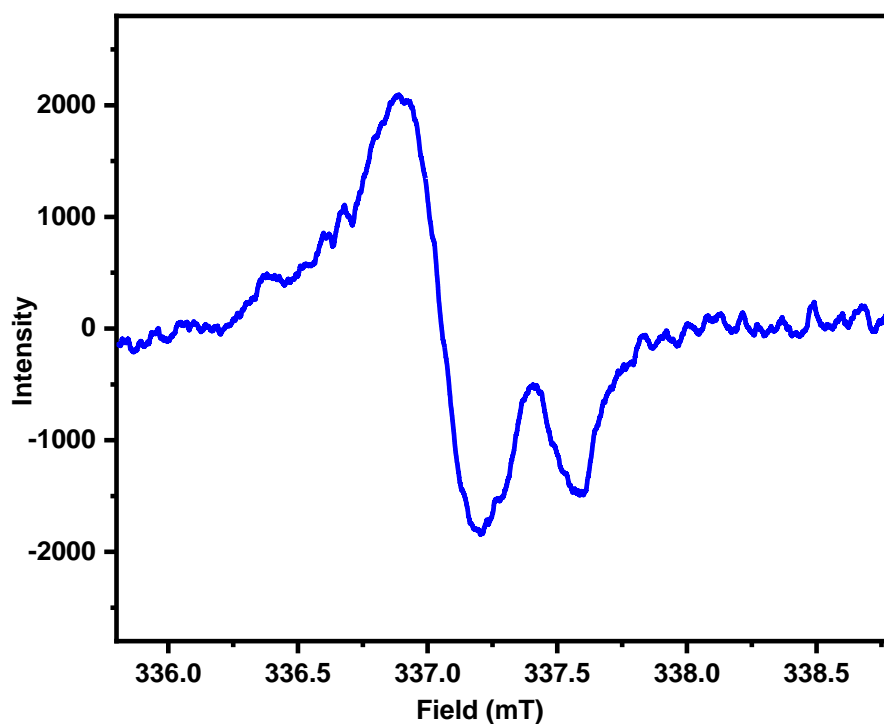

**Figure S4.** X-band ESR spectrum of  $[(\text{Me}_2\text{-cAAC}=\text{P})_6\text{Ag}_{10}](\text{NTf}_2)_2$  (4) in DCM at 293 K.

$$g = \frac{6.626 \times 10^{-34} \text{ J s}^{-1} \times 9.435 \times 10^{69} \text{ s}^{-1}}{9.2740 \times 10^{-24} \text{ J T}^{-1} \times 337.05 \times 10^{-3} \text{ T}}$$

$$g = \frac{6.2520 \times 10^{-24}}{3.1258 \times 10^{-24}}$$

$$g = 2.0001$$



## S5. ESI-MS spectra of NCs 2, 4

### S5.1. ESI-MS spectrum of complex $[(\text{Me}_2\text{-cAAC}=\text{P})_6\text{Ag}_{12}\text{Cl}_3]$ (2) in DCM.

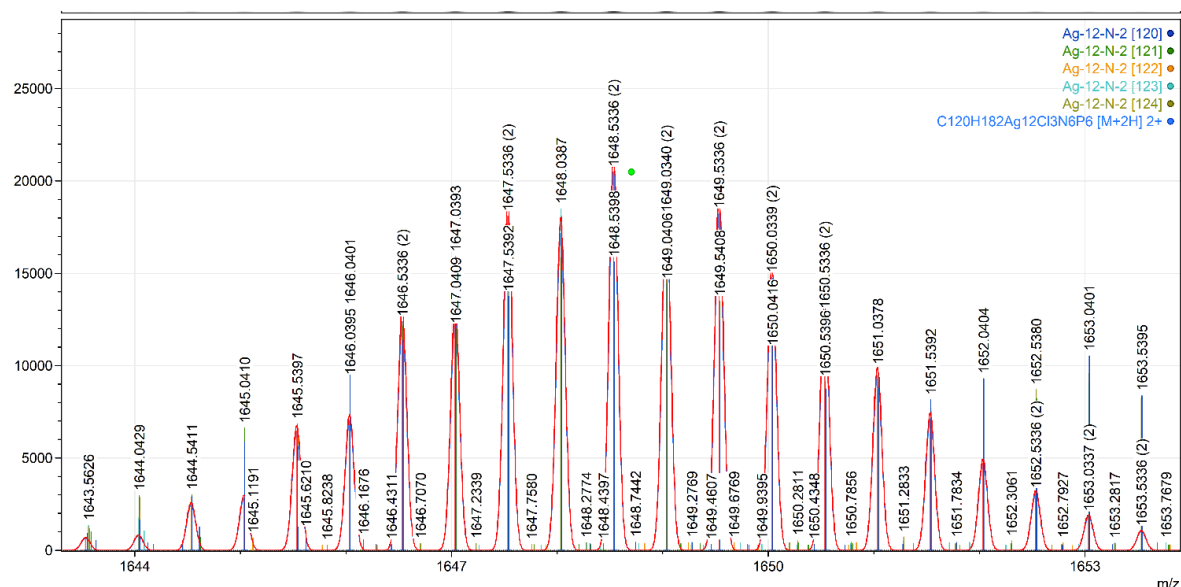

**Figure S5.** Experimental (green) and simulated (red) ESI-MS mass spectra of corresponding ionic fragment isotopic pattern is given by  $[\text{C}_{120}\text{H}_{186}\text{Ag}_{12}\text{N}_6\text{P}_6\text{Cl}_3 - 2\text{H}(\text{radical})]^{2+}$ .

### S5.2. ESI-MS spectrum of complex $[(\text{Me}_2\text{-cAAC}=\text{P})_6(\text{Ag})_{10}](\text{NTf}_2)_2$ (4) in DCM.

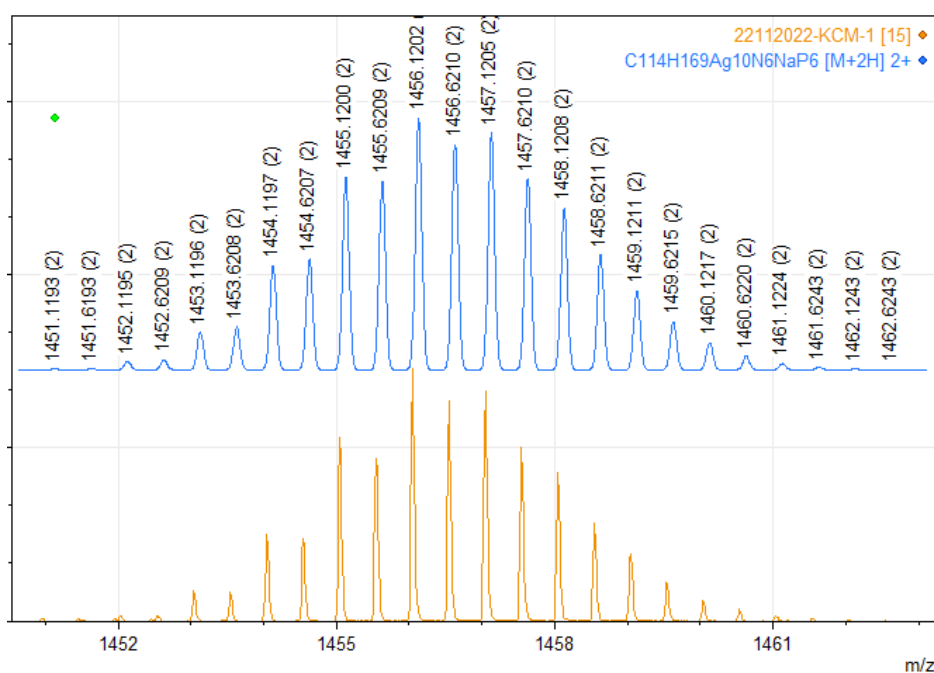

**Figure S6.** Experimental (bottom) and simulated (top) ESI-MS mass spectra of  $[(\text{Me}_2\text{-cAAC}=\text{P})_6\text{Ag}_{10} + \text{Na} - 2\text{C}_3\text{H}_7 - \text{H}]$  dication.  $\text{Me}_2\text{-cAAC}=\text{P} = \text{C}_{20}\text{H}_{31}\text{NP}$ .

**S6.1 UV-vis absorption spectrum of  $[(\text{Me}_2\text{-cAAC}=\text{P})_6\text{Ag}_{12}\text{Cl}_3]$  (**2**) in THF solution at room temperature (298 K)**

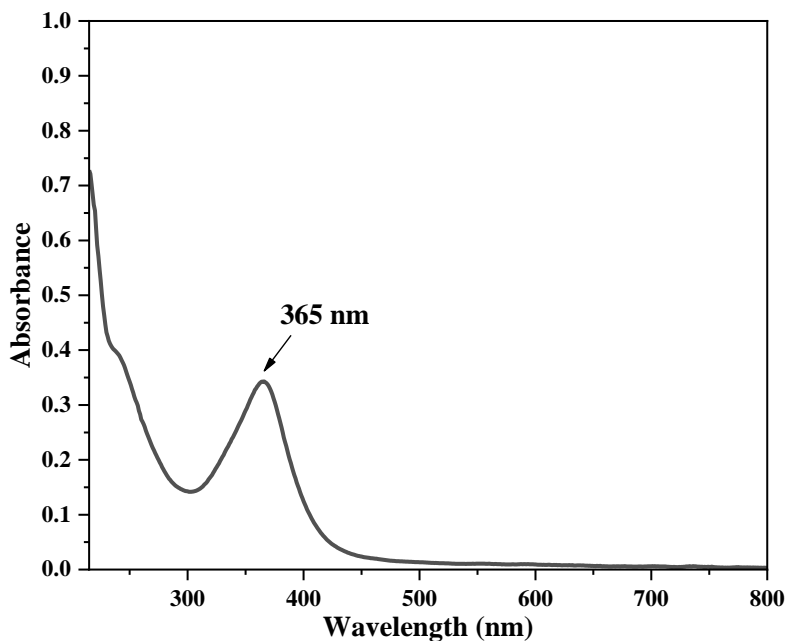

**Figure S7.** UV-vis Absorption spectrum of  $[(\text{Me}_2\text{-cAAC}=\text{P})_6\text{Ag}_{12}\text{Cl}_3]$  (**2**) in THF solution at 298 K. The absorption maximum ( $\lambda_{\text{max}}$ ) was observed at 365 nm.

**S6.2 UV-vis absorption spectrum of  $[(\text{Me}_2\text{-cAAC}=\text{P})_6(\text{Ag})_{10}](\text{NTf}_2)_2$  (**4**) in THF solution at 298 K**

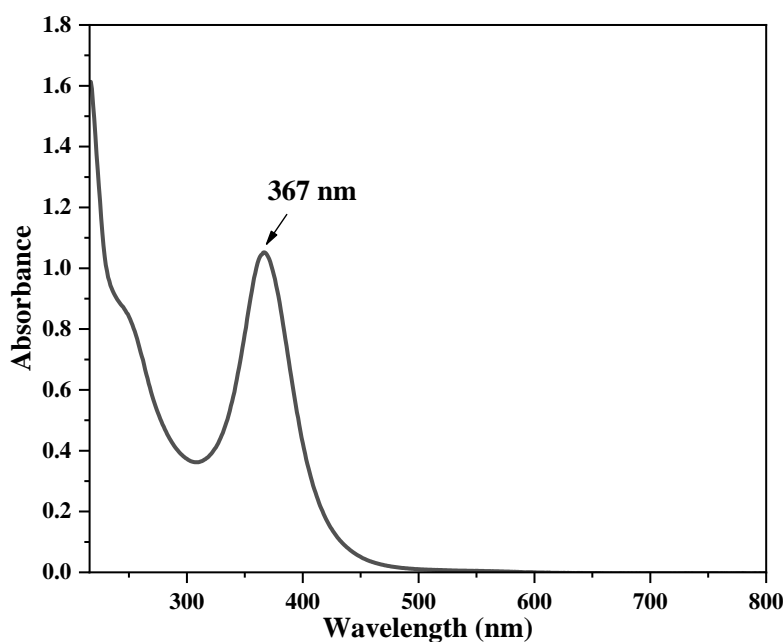

**Figure S8.** UV-vis absorption spectrum of  $[(\text{Me}_2\text{-cAAC}=\text{P})_6(\text{Ag})_{10}](\text{NTf}_2)_2$  (**4**) in THF solution at 298 K. The  $\lambda_{\text{max}}$  was observed at 367 nm.

## S7. X-ray crystallographic analysis of NCs 2, and 4

The single crystal X-ray data were collected on a **Bruker D8 VENTURE** diffractometer equipped with **PHOTON III C28** detector using **I $\mu$ S 3.0 microfocus** sealed X-ray source with **Molybdenum K $\alpha$  ( $\lambda = 0.71073 \text{ \AA}$ ) radiation**. Complete data set was collected following the strategies generated using the APEX4<sup>5</sup> module of the Bruker software suite. The data reduction was carried out using SAINTPLUS<sup>5</sup> and multi-scan absorption correction was performed using the program **SADABS**.<sup>5</sup> The crystal structures were solved by **intrinsic phasing method (SHELXT)**<sup>6</sup> and was refined with full-matrix least squares on F2 using **ShelXle**<sup>7</sup> plug-in included in APEX4. All non-hydrogen atoms were refined anisotropically.

**Table S1.** X-ray crystallographic parameters for nanoclusters **2**, and **4**.

| <b>Crystal formula</b>         | <b>C<sub>120</sub>H<sub>186</sub>Ag<sub>12</sub>Cl<sub>3</sub>N<sub>6</sub>P<sub>6</sub></b> | <b>C<sub>124</sub>H<sub>186</sub>Ag<sub>10</sub>F<sub>12</sub>N<sub>8</sub>O<sub>8</sub>P<sub>6</sub>S<sub>4</sub></b> |
|--------------------------------|----------------------------------------------------------------------------------------------|------------------------------------------------------------------------------------------------------------------------|
| <b>Complex</b>                 | <b>2</b>                                                                                     | <b>4</b>                                                                                                               |
| <b>M<sub>r</sub></b>           | 3299.35                                                                                      | 3537.56                                                                                                                |
| <b>CCDC Number</b>             | 2242239                                                                                      | 2194453                                                                                                                |
| <b>Crystal system</b>          | Trigonal                                                                                     | Triclinic                                                                                                              |
| <b>Space group</b>             | R -3                                                                                         | P -1                                                                                                                   |
| <b>Temperature (K)</b>         | 100                                                                                          | 100                                                                                                                    |
| <b>a (Å)</b>                   | 32.5258(13)                                                                                  | 16.8356(9)                                                                                                             |
| <b>b (Å)</b>                   | 32.5258(13)                                                                                  | 22.3238(14)                                                                                                            |
| <b>c (Å)</b>                   | 16.6904(10)                                                                                  | 26.6877(15)                                                                                                            |
| <b><math>\alpha</math> (°)</b> | 90                                                                                           | 70.721(2)                                                                                                              |
| <b><math>\beta</math> (°)</b>  | 90                                                                                           | 73.976(2)                                                                                                              |
| <b><math>\gamma</math> (°)</b> | 120                                                                                          | 71.123(2)                                                                                                              |
| <b>V (Å<sup>3</sup>)</b>       | 15291.6(15)                                                                                  | 8796.2(9)                                                                                                              |
| <b>Z</b>                       | 3                                                                                            | 2                                                                                                                      |

|                                                |         |         |
|------------------------------------------------|---------|---------|
| $\lambda$ (Å)                                  | 0.71073 | 0.71073 |
| $\mu$ (mm <sup>-1</sup> )                      | 1.24    | 1.25    |
| $R_{\text{int}}$                               | 0.051   | 0.059   |
| $R_1$ [ $I > 2\sigma(I)$ ]                     | 0.083   | 0.070   |
| $wR(F^2)$                                      | 0.276   | 0.235   |
| No. of measured reflections                    | 211782  | 393575  |
| Independent reflections                        | 6982    | 46090   |
| observed [ $I > 2\sigma(I)$ ] reflections      | 4867    | 34011   |
| $\Delta\rho_{\text{max}}$ (e Å <sup>-3</sup> ) | 1.67    | 3.25    |
| $\Delta\rho_{\text{min}}$ (e Å <sup>-3</sup> ) | -1.64   | -2.10   |
| Goof                                           | 1.13    | 1.04    |

Bond length (Å) of **2**.

|                      |            |          |           |
|----------------------|------------|----------|-----------|
| Ag1—Ag2 <sup>i</sup> | 3.0244(10) | C11—H11  | 1         |
| Ag1—Ag2              | 2.8826(10) | C11—C12  | 1.551(16) |
| Ag1—Cl1              | 2.4530(14) | C11—C19  | 1.538(12) |
| Ag1—Cl2              | 2.572(7)   | C12—H12A | 0.98      |
| Ag1—P2               | 2.455(3)   | C12—H12B | 0.98      |
| Ag2—P2 <sup>ii</sup> | 2.379(2)   | C12—H12C | 0.98      |
| Ag2—P2               | 2.401(2)   | C13—H13  | 1         |
| P2—C10               | 1.750(9)   | C13—C14  | 1.552(13) |
| N1—C1                | 1.471(10)  | C13—C20  | 1.508(13) |
| N1—C7                | 1.518(12)  | C14—H14A | 0.98      |
| N1—C10               | 1.339(10)  | C14—H14B | 0.98      |
| C1—C2                | 1.379(13)  | C14—H14C | 0.98      |
| C1—C6                | 1.401(12)  | C15—H15A | 0.98      |

|        |           |          |      |
|--------|-----------|----------|------|
| C2—C3  | 1.411(13) | C15—H15B | 0.98 |
| C2—C11 | 1.535(13) | C15—H15C | 0.98 |
| C3—H3  | 0.95      | C16—H16A | 0.98 |
| C3—C4  | 1.436(14) | C16—H16B | 0.98 |
| C4—H4  | 0.95      | C16—H16C | 0.98 |
| C4—C5  | 1.360(15) | C17—H17A | 0.98 |
| C5—H5  | 0.95      | C17—H17B | 0.98 |
| C5—C6  | 1.396(13) | C17—H17C | 0.98 |
| C6—C13 | 1.483(14) | C18—H18A | 0.98 |
| C7—C8  | 1.484(14) | C18—H18B | 0.98 |
| C7—C15 | 1.552(18) | C18—H18C | 0.98 |
| C7—C16 | 1.530(16) | C19—H19A | 0.98 |
| C8—H8A | 0.99      | C19—H19B | 0.98 |
| C8—H8B | 0.99      | C19—H19C | 0.98 |
| C8—C9  | 1.445(13) | C20—H20A | 0.98 |
| C9—C10 | 1.519(12) | C20—H20B | 0.98 |
| C9—C17 | 1.482(17) | C20—H20C | 0.98 |
| C9—C18 | 1.670(19) |          |      |

Bond angle (°) of **2**.

|                                         |           |            |           |
|-----------------------------------------|-----------|------------|-----------|
| Ag2—Ag1—Ag2 <sup>i</sup>                | 90.30(3)  | C9—C8—H8A  | 109.1     |
| Cl1—Ag1—Ag2                             | 103.13(4) | C9—C8—H8B  | 109.1     |
| Cl1—Ag1—Ag2 <sup>i</sup>                | 99.21(4)  | C8—C9—C10  | 104.7(8)  |
| Cl1—Ag1—Cl2                             | 70.8(2)   | C8—C9—C17  | 109.3(11) |
| Cl1—Ag1—P2                              | 133.69(8) | C8—C9—C18  | 108.2(10) |
| Cl2—Ag1—Ag2                             | 136.83(3) | C10—C9—C18 | 102.1(9)  |
| Cl2—Ag1—Ag2 <sup>i</sup>                | 132.70(3) | C17—C9—C10 | 111.5(9)  |
| P2—Ag1—Ag2 <sup>i</sup>                 | 50.17(5)  | C17—C9—C18 | 119.9(11) |
| P2—Ag1—Ag2                              | 52.73(5)  | N1—C10—P2  | 125.4(7)  |
| P2—Ag1—Cl2                              | 155.0(2)  | N1—C10—C9  | 107.4(7)  |
| Ag1—Ag2—Ag1 <sup>ii</sup>               | 70.08(6)  | C9—C10—P2  | 126.8(6)  |
| P2—Ag2—Ag1                              | 54.45(7)  | C2—C11—H11 | 108.5     |
| P2 <sup>ii</sup> —Ag2—Ag1 <sup>ii</sup> | 52.40(7)  | C2—C11—C12 | 110.5(8)  |
| P2 <sup>ii</sup> —Ag2—Ag1               | 110.99(6) | C2—C11—C19 | 110.6(8)  |

|                                           |            |               |           |
|-------------------------------------------|------------|---------------|-----------|
| P2—Ag2—Ag1 <sup>ii</sup>                  | 111.17(6)  | C12—C11—H11   | 108.5     |
| P2 <sup>ii</sup> —Ag2—P2                  | 163.21(11) | C19—C11—H11   | 108.5     |
| Ag1 <sup>iii</sup> —Cl1—Ag1 <sup>ii</sup> | 92.47(3)   | C19—C11—C12   | 110.1(10) |
| Ag1 <sup>iii</sup> —Cl1—Ag1 <sup>iv</sup> | 87.54(3)   | C11—C12—H12A  | 109.5     |
| Ag1 <sup>v</sup> —Cl1—Ag1 <sup>i</sup>    | 87.53(3)   | C11—C12—H12B  | 109.5     |
| Ag1 <sup>v</sup> —Cl1—Ag1 <sup>iv</sup>   | 92.47(3)   | C11—C12—H12C  | 109.5     |
| Ag1 <sup>v</sup> —Cl1—Ag1 <sup>iii</sup>  | 87.53(4)   | H12A—C12—H12B | 109.5     |
| Ag1 <sup>ii</sup> —Cl1—Ag1 <sup>iv</sup>  | 87.54(3)   | H12A—C12—H12C | 109.5     |
| Ag1 <sup>i</sup> —Cl1—Ag1 <sup>iii</sup>  | 92.46(3)   | H12B—C12—H12C | 109.5     |
| Ag1—Cl1—Ag1 <sup>ii</sup>                 | 87.53(4)   | C6—C13—H13    | 108.7     |
| Ag1 <sup>i</sup> —Cl1—Ag1                 | 87.53(4)   | C6—C13—C14    | 112.0(9)  |
| Ag1 <sup>i</sup> —Cl1—Ag1 <sup>iv</sup>   | 180        | C6—C13—C20    | 110.6(9)  |
| Ag1 <sup>iii</sup> —Cl1—Ag1               | 180        | C14—C13—H13   | 108.7     |
| Ag1—Cl1—Ag1 <sup>iv</sup>                 | 92.47(3)   | C20—C13—H13   | 108.7     |
| Ag1 <sup>v</sup> —Cl1—Ag1 <sup>ii</sup>   | 180        | C20—C13—C14   | 108.0(8)  |
| Ag1 <sup>i</sup> —Cl1—Ag1 <sup>ii</sup>   | 92.47(3)   | C13—C14—H14A  | 109.5     |
| Ag1 <sup>v</sup> —Cl1—Ag1                 | 92.47(3)   | C13—C14—H14B  | 109.5     |
| Ag1 <sup>v</sup> —Cl2—Ag1                 | 87.1(3)    | C13—C14—H14C  | 109.5     |
| Ag1—Cl2—Ag1 <sup>iv</sup>                 | 87.1(3)    | H14A—C14—H14B | 109.5     |
| Ag1 <sup>v</sup> —Cl2—Ag1 <sup>iv</sup>   | 87.1(3)    | H14A—C14—H14C | 109.5     |
| Ag2 <sup>i</sup> —P2—Ag1                  | 77.44(7)   | H14B—C14—H14C | 109.5     |
| Ag2—P2—Ag1                                | 72.82(7)   | C7—C15—H15A   | 109.5     |
| Ag2 <sup>i</sup> —P2—Ag2                  | 122.39(9)  | C7—C15—H15B   | 109.5     |
| C10—P2—Ag1                                | 106.7(3)   | C7—C15—H15C   | 109.5     |
| C10—P2—Ag2 <sup>i</sup>                   | 117.9(3)   | H15A—C15—H15B | 109.5     |
| C10—P2—Ag2                                | 117.4(3)   | H15A—C15—H15C | 109.5     |
| C1—N1—C7                                  | 121.5(7)   | H15B—C15—H15C | 109.5     |
| C10—N1—C1                                 | 123.6(7)   | C7—C16—H16A   | 109.5     |
| C10—N1—C7                                 | 114.8(7)   | C7—C16—H16B   | 109.5     |
| C2—C1—N1                                  | 117.5(8)   | C7—C16—H16C   | 109.5     |
| C2—C1—C6                                  | 123.6(8)   | H16A—C16—H16B | 109.5     |
| C6—C1—N1                                  | 118.9(9)   | H16A—C16—H16C | 109.5     |
| C1—C2—C3                                  | 117.0(9)   | H16B—C16—H16C | 109.5     |
| C1—C2—C11                                 | 125.9(9)   | C9—C17—H17A   | 109.5     |
| C3—C2—C11                                 | 117.0(10)  | C9—C17—H17B   | 109.5     |

|            |           |               |       |
|------------|-----------|---------------|-------|
| C2—C3—H3   | 119.2     | C9—C17—H17C   | 109.5 |
| C2—C3—C4   | 121.6(10) | H17A—C17—H17B | 109.5 |
| C4—C3—H3   | 119.2     | H17A—C17—H17C | 109.5 |
| C3—C4—H4   | 121.5     | H17B—C17—H17C | 109.5 |
| C5—C4—C3   | 117.0(10) | C9—C18—H18A   | 109.5 |
| C5—C4—H4   | 121.5     | C9—C18—H18B   | 109.5 |
| C4—C5—H5   | 118       | C9—C18—H18C   | 109.5 |
| C4—C5—C6   | 124.0(9)  | H18A—C18—H18B | 109.5 |
| C6—C5—H5   | 118       | H18A—C18—H18C | 109.5 |
| C1—C6—C13  | 124.1(9)  | H18B—C18—H18C | 109.5 |
| C5—C6—C1   | 116.7(9)  | C11—C19—H19A  | 109.5 |
| C5—C6—C13  | 119.0(9)  | C11—C19—H19B  | 109.5 |
| N1—C7—C15  | 110.9(8)  | C11—C19—H19C  | 109.5 |
| N1—C7—C16  | 110.1(10) | H19A—C19—H19B | 109.5 |
| C8—C7—N1   | 99.5(7)   | H19A—C19—H19C | 109.5 |
| C8—C7—C15  | 111.4(13) | H19B—C19—H19C | 109.5 |
| C8—C7—C16  | 112.6(10) | C13—C20—H20A  | 109.5 |
| C16—C7—C15 | 111.7(11) | C13—C20—H20B  | 109.5 |
| C7—C8—H8A  | 109.1     | C13—C20—H20C  | 109.5 |
| C7—C8—H8B  | 109.1     | H20A—C20—H20B | 109.5 |
| H8A—C8—H8B | 107.9     | H20A—C20—H20C | 109.5 |
| C9—C8—C7   | 112.3(9)  | H20B—C20—H20C | 109.5 |

Symmetry codes: (i)  $x-y+2/3$ ,  $x+1/3$ ,  $-z+4/3$ ; (ii)  $y-1/3$ ,  $-x+y+1/3$ ,  $-z+4/3$ ; (iii)  $-x+2/3$ ,  $-y+4/3$ ,  $-z+4/3$ ; (iv)  $-x+y$ ,  $-x+1$ ,  $z$ ; (v)  $-y+1$ ,  $x-y+1$ ,  $z$

Bond length (Å) of **4**.

|         |          |         |           |
|---------|----------|---------|-----------|
| Ag1—P2  | 2.332(3) | C9—C10  | 1.517(13) |
| Ag1—P1  | 2.434(3) | C9—C17  | 1.538(9)  |
| Ag2—P3  | 2.348(3) | C9—C17' | 1.552(9)  |
| Ag2—P2  | 2.431(3) | C9—C18  | 1.554(12) |
| Ag2—Ag4 | 2.916(5) | C11—C12 | 1.531(12) |
| Ag3—P3  | 2.319(5) | C11—C22 | 1.559(12) |
| Ag3—P4  | 2.464(5) | C13—C14 | 1.499(14) |
| Ag3—Ag5 | 2.889(7) | C13—C23 | 1.556(13) |
| Ag3—Ag6 | 2.903(5) | C19—C32 | 1.515(9)  |
| Ag4—P5  | 2.321(4) | C20—C40 | 1.490(13) |

|           |           |          |           |
|-----------|-----------|----------|-----------|
| Ag4—P2    | 2.485(4)  | C20—C41  | 1.513(13) |
| Ag5—P6    | 2.364(4)  | C20—C21  | 1.532(14) |
| Ag5—P3    | 2.482(4)  | C24—C27  | 1.543(11) |
| Ag5—Ag1A  | 3.005(7)  | C25—C26  | 1.504(16) |
| Ag6—P5    | 2.348(4)  | C25—C56  | 1.529(9)  |
| Ag6—P4    | 2.445(4)  | C25—C57  | 1.533(15) |
| Ag6—Ag1A  | 3.207(7)  | C26—C27  | 1.497(10) |
| Ag7—P4    | 2.374(3)  | C27—C59  | 1.488(15) |
| Ag7—Ag9   | 2.472(3)  | C27—C58  | 1.532(17) |
| Ag7—Ag8   | 3.044(3)  | C28—C29  | 1.523(7)  |
| Ag8—P6    | 2.397(3)  | C29—C60  | 1.513(10) |
| Ag8—Ag9   | 2.458(3)  | C29—C61  | 1.529(10) |
| Ag1A—P5   | 2.368(6)  | C29—C30  | 1.543(8)  |
| Ag1A—P6   | 2.424(6)  | C30—C31  | 1.519(9)  |
| Ag1'—P1   | 2.261(8)  | C31—C63  | 1.521(9)  |
| Ag1'—P2   | 2.523(7)  | C31—C62  | 1.531(10) |
| Ag2'—P2   | 2.312(9)  | C32—C33  | 1.475(11) |
| Ag2'—P3   | 2.494(9)  | C32—C70  | 1.518(11) |
| Ag2'—Ag4' | 2.865(13) | C32—C40  | 1.539(12) |
| Ag3'—P4   | 2.252(11) | C34—C35  | 1.400(11) |
| Ag3'—P3   | 2.518(11) | C34—C39  | 1.421(10) |
| Ag3'—Ag6' | 2.832(11) | C35—C36  | 1.397(11) |
| Ag3'—Ag5' | 2.873(17) | C35—C71  | 1.530(10) |
| Ag4'—P2   | 2.239(9)  | C36—C37  | 1.408(11) |
| Ag4'—P5   | 2.551(9)  | C37—C38  | 1.357(12) |
| Ag5'—P3   | 2.271(9)  | C38—C39  | 1.373(10) |
| Ag5'—P6   | 2.573(9)  | C39—C73  | 1.492(11) |
| Ag5'—Ag1B | 2.980(17) | C42—C43  | 1.540(9)  |
| Ag6'—P4   | 2.328(8)  | C43—C75  | 1.416(9)  |
| Ag6'—P5   | 2.469(9)  | C43—C76' | 1.423(9)  |
| Ag6'—Ag1B | 3.189(16) | C43—C75' | 1.451(9)  |
| Ag7'—P4   | 2.277(9)  | C43—C44  | 1.458(9)  |
| Ag7'—Ag9' | 2.630(14) | C43—C76  | 1.521(9)  |
| Ag7'—Ag8' | 3.094(12) | C44—C45  | 1.511(10) |
| Ag8'—P6   | 2.196(9)  | C45—C77  | 1.494(12) |
| Ag8'—Ag9' | 2.668(13) | C45—C78  | 1.518(10) |
| Ag1B—P6   | 2.360(12) | C46—C47  | 1.536(9)  |
| Ag1B—P5   | 2.401(12) | C47—C86  | 1.518(9)  |
| S1—O1     | 1.369(9)  | C47—C85  | 1.537(9)  |
| S1—O2     | 1.383(10) | C47—C48  | 1.546(8)  |
| S1—N7     | 1.579(7)  | C48—C49  | 1.514(11) |



|          |           |           |           |
|----------|-----------|-----------|-----------|
| S1—C12A  | 1.781(8)  | C49—C87   | 1.512(10) |
| C12A—F3  | 1.364(8)  | C49—C88   | 1.550(10) |
| C12A—F1  | 1.377(8)  | C50—C55   | 1.390(13) |
| C12A—F2  | 1.386(9)  | C50—C51   | 1.396(12) |
| S1'—F1'  | 1.20(2)   | C51—C52   | 1.395(13) |
| S1'—N7   | 1.456(8)  | C51—C95   | 1.613(17) |
| S1'—C12B | 1.788(10) | C52—C53   | 1.390(14) |
| S1'—O1   | 1.818(12) | C53—C54   | 1.401(14) |
| S1'—S2   | 2.242(10) | C54—C55   | 1.388(13) |
| C12B—F2' | 1.386(10) | C55—C97   | 1.56(2)   |
| C12B—F3' | 1.388(10) | C97—C99   | 1.42(2)   |
| C12B—F1' | 1.397(10) | C97—C98   | 1.43(2)   |
| F1'—F2'  | 1.29(4)   | C99—C98   | 2.02(3)   |
| S2—O3    | 1.402(8)  | C50'—C51' | 1.384(17) |
| S2—O4    | 1.405(9)  | C50'—C55' | 1.396(17) |
| S2—N7    | 1.595(11) | C51'—C95  | 0.88(3)   |
| S2—C119  | 1.831(14) | C51'—C52' | 1.399(17) |
| S3—O5    | 1.438(8)  | C51'—C11B | 1.98(3)   |
| S3—O6    | 1.442(9)  | C51'—C96  | 1.99(3)   |
| S3—N8    | 1.555(9)  | C52'—C53' | 1.399(17) |
| S3—C120  | 1.792(16) | C52'—C95  | 1.96(2)   |
| S4—O7    | 1.429(9)  | C53'—C54' | 1.375(18) |
| S4—O8    | 1.450(7)  | C54'—C55' | 1.405(17) |
| S4—N8    | 1.558(9)  | C55'—C97' | 1.55(3)   |
| S4—C121  | 1.761(11) | C97'—C99' | 1.76(3)   |
| P1—C10   | 1.752(10) | C97'—C98  | 1.76(3)   |
| P2—C19   | 1.791(7)  | C64—C65   | 1.404(9)  |
| P3—C42   | 1.766(6)  | C64—C69   | 1.419(10) |
| P4—C24   | 1.756(6)  | C65—C66   | 1.391(9)  |
| P5—C28   | 1.792(5)  | C65—C100  | 1.486(11) |
| P6—C46   | 1.769(5)  | C66—C67   | 1.381(13) |
| F4—C119  | 1.357(16) | C67—C68   | 1.391(12) |
| F5—C119  | 1.281(13) | C68—C69   | 1.382(8)  |
| F6—C119  | 1.377(17) | C69—C102  | 1.502(10) |
| F7—C120  | 1.317(15) | C71—C72   | 1.499(12) |
| F8—C121  | 1.309(12) | C71—C104  | 1.565(11) |
| F9—C120  | 1.330(15) | C73—C105  | 1.534(11) |
| F10—C120 | 1.393(17) | C73—C74   | 1.568(10) |
| F11—C121 | 1.328(12) | C75—C76   | 1.69(2)   |
| F12—C121 | 1.350(10) | C75'—C76' | 1.38(2)   |
| N1—C10   | 1.328(9)  | C79—C84   | 1.412(7)  |

|         |           |           |           |
|---------|-----------|-----------|-----------|
| N1—C1   | 1.444(9)  | C79—C80   | 1.417(8)  |
| N1—C7   | 1.493(10) | C80—C81   | 1.388(9)  |
| N2—C19  | 1.335(8)  | C80—C106  | 1.519(8)  |
| N2—C34  | 1.432(9)  | C81—C82   | 1.373(10) |
| N2—C20  | 1.521(9)  | C82—C83   | 1.402(10) |
| N3—C24  | 1.337(9)  | C83—C84   | 1.391(9)  |
| N3—C50' | 1.38(2)   | C84—C108  | 1.499(9)  |
| N3—C50  | 1.515(15) | C89—C90   | 1.397(11) |
| N3—C25  | 1.534(11) | C89—C94   | 1.416(9)  |
| N4—C28  | 1.298(7)  | C90—C91   | 1.354(13) |
| N4—C64  | 1.464(7)  | C90—C110  | 1.514(10) |
| N4—C31  | 1.536(6)  | C91—C92   | 1.386(13) |
| N5—C42  | 1.310(8)  | C92—C93   | 1.375(14) |
| N5—C79  | 1.441(7)  | C93—C94   | 1.390(12) |
| N5—C45  | 1.544(7)  | C94—C112  | 1.495(10) |
| N6—C46  | 1.325(7)  | C95—C96   | 1.518(17) |
| N6—C89  | 1.448(10) | C95—C11B  | 1.539(9)  |
| N6—C49  | 1.530(8)  | C95—C11A  | 1.551(10) |
| C1—C2   | 1.376(12) | C100—C101 | 1.535(10) |
| C1—C6   | 1.421(13) | C100—C114 | 1.545(9)  |
| C2—C3   | 1.412(13) | C102—C103 | 1.548(9)  |
| C2—C11  | 1.513(15) | C102—C115 | 1.565(9)  |
| C3—C4   | 1.315(18) | C106—C107 | 1.522(9)  |
| C4—C5   | 1.407(18) | C106—C116 | 1.550(9)  |
| C5—C6   | 1.363(14) | C108—C109 | 1.505(10) |
| C6—C13  | 1.536(15) | C108—C117 | 1.569(8)  |
| C7—C15  | 1.503(13) | C110—C122 | 1.532(17) |
| C7—C16  | 1.509(13) | C110—C111 | 1.558(15) |
| C7—C8   | 1.521(13) | C112—C113 | 1.547(11) |
| C8—C9   | 1.497(17) | C112—C118 | 1.556(9)  |

Bond angle (°) of **4**.

|            |            |             |          |
|------------|------------|-------------|----------|
| P2—Ag1—P1  | 172.31(16) | C17'—C9—C18 | 106.5(9) |
| P3—Ag2—P2  | 159.89(17) | N1—C10—C9   | 111.0(8) |
| P3—Ag2—Ag4 | 109.35(14) | N1—C10—P1   | 127.4(7) |
| P2—Ag2—Ag4 | 54.48(10)  | C9—C10—P1   | 120.4(6) |
| P3—Ag3—P4  | 162.0(2)   | C2—C11—C12  | 113.9(8) |
| P3—Ag3—Ag5 | 55.63(13)  | C2—C11—C22  | 109.9(9) |

|              |            |             |           |
|--------------|------------|-------------|-----------|
| P4—Ag3—Ag5   | 111.5(2)   | C12—C11—C22 | 109.3(7)  |
| P3—Ag3—Ag6   | 110.21(18) | C14—C13—C6  | 109.9(9)  |
| P4—Ag3—Ag6   | 53.43(13)  | C14—C13—C23 | 107.9(9)  |
| Ag5—Ag3—Ag6  | 86.64(17)  | C6—C13—C23  | 114.8(10) |
| P5—Ag4—P2    | 169.31(19) | N2—C19—C32  | 110.7(5)  |
| P5—Ag4—Ag2   | 123.53(17) | N2—C19—P2   | 124.1(5)  |
| P2—Ag4—Ag2   | 52.78(9)   | C32—C19—P2  | 125.1(5)  |
| P6—Ag5—P3    | 169.6(2)   | C40—C20—C41 | 106.5(9)  |
| P6—Ag5—Ag3   | 121.5(2)   | C40—C20—N2  | 102.0(6)  |
| P3—Ag5—Ag3   | 50.46(13)  | C41—C20—N2  | 110.6(7)  |
| P6—Ag5—Ag1A  | 52.04(14)  | C40—C20—C21 | 118.5(10) |
| P3—Ag5—Ag1A  | 119.63(17) | C41—C20—C21 | 106.5(7)  |
| Ag3—Ag5—Ag1A | 99.23(19)  | N2—C20—C21  | 112.4(8)  |
| P5—Ag6—P4    | 161.27(19) | N3—C24—C27  | 108.8(6)  |
| P5—Ag6—Ag3   | 122.19(19) | N3—C24—P4   | 125.2(6)  |
| P4—Ag6—Ag3   | 54.04(12)  | C27—C24—P4  | 126.0(5)  |
| P5—Ag6—Ag1A  | 47.42(12)  | C26—C25—C56 | 114.8(12) |
| P4—Ag6—Ag1A  | 114.04(16) | C26—C25—C57 | 108.3(11) |
| Ag3—Ag6—Ag1A | 94.44(17)  | C56—C25—C57 | 111.0(11) |
| P4—Ag7—Ag9   | 166.97(14) | C26—C25—N3  | 101.0(7)  |
| P4—Ag7—Ag8   | 115.75(12) | C56—C25—N3  | 110.1(10) |
| Ag9—Ag7—Ag8  | 51.65(7)   | C57—C25—N3  | 111.2(8)  |
| P6—Ag8—Ag9   | 164.62(14) | C27—C26—C25 | 109.7(9)  |
| P6—Ag8—Ag7   | 113.73(11) | C59—C27—C26 | 110.6(9)  |
| Ag9—Ag8—Ag7  | 52.08(7)   | C59—C27—C58 | 102.1(11) |
| Ag8—Ag9—Ag7  | 76.27(9)   | C26—C27—C58 | 112.9(10) |
| P5—Ag1A—P6   | 154.4(3)   | C59—C27—C24 | 113.3(8)  |
| P5—Ag1A—Ag5  | 108.2(2)   | C26—C27—C24 | 103.5(7)  |
| P6—Ag1A—Ag5  | 50.24(12)  | C58—C27—C24 | 114.7(8)  |
| P5—Ag1A—Ag6  | 46.90(12)  | N4—C28—C29  | 110.8(4)  |
| P6—Ag1A—Ag6  | 109.39(18) | N4—C28—P5   | 125.0(4)  |
| Ag5—Ag1A—Ag6 | 79.48(16)  | C29—C28—P5  | 124.2(4)  |
| P1—Ag1'—P2   | 167.1(3)   | C60—C29—C28 | 111.1(5)  |
| P2—Ag2'—P3   | 156.5(4)   | C60—C29—C61 | 108.3(6)  |
| P2—Ag2'—Ag4' | 49.9(3)    | C28—C29—C61 | 112.6(5)  |

|                |          |               |           |
|----------------|----------|---------------|-----------|
| P3—Ag2'—Ag4'   | 106.7(3) | C60—C29—C30   | 112.0(5)  |
| P4—Ag3'—P3     | 164.0(4) | C28—C29—C30   | 102.3(5)  |
| P4—Ag3'—Ag6'   | 53.0(3)  | C61—C29—C30   | 110.5(5)  |
| P3—Ag3'—Ag6'   | 111.8(4) | C31—C30—C29   | 107.5(5)  |
| P4—Ag3'—Ag5'   | 119.8(5) | C30—C31—C63   | 111.7(6)  |
| P3—Ag3'—Ag5'   | 49.3(3)  | C30—C31—C62   | 113.2(6)  |
| Ag6'—Ag3'—Ag5' | 88.8(4)  | C63—C31—C62   | 109.2(5)  |
| P2—Ag4'—P5     | 175.1(5) | C30—C31—N4    | 100.2(4)  |
| P2—Ag4'—Ag2'   | 52.1(3)  | C63—C31—N4    | 112.5(5)  |
| P5—Ag4'—Ag2'   | 123.1(4) | C62—C31—N4    | 109.8(5)  |
| P3—Ag5'—P6     | 169.9(6) | C33—C32—C19   | 108.6(6)  |
| P3—Ag5'—Ag3'   | 57.2(3)  | C33—C32—C70   | 106.0(7)  |
| P6—Ag5'—Ag3'   | 112.8(5) | C19—C32—C70   | 116.2(6)  |
| P3—Ag5'—Ag1B   | 128.7(4) | C33—C32—C40   | 116.5(8)  |
| P6—Ag5'—Ag1B   | 49.7(3)  | C19—C32—C40   | 101.6(6)  |
| Ag3'—Ag5'—Ag1B | 96.0(5)  | C70—C32—C40   | 108.4(8)  |
| P4—Ag6'—P5     | 160.7(4) | C35—C34—C39   | 121.0(7)  |
| P4—Ag6'—Ag3'   | 50.6(2)  | C35—C34—N2    | 119.0(6)  |
| P5—Ag6'—Ag3'   | 118.7(4) | C39—C34—N2    | 119.9(7)  |
| P4—Ag6'—Ag1B   | 112.9(3) | C36—C35—C34   | 118.6(7)  |
| P5—Ag6'—Ag1B   | 48.2(3)  | C36—C35—C71   | 116.3(7)  |
| Ag3'—Ag6'—Ag1B | 92.3(4)  | C34—C35—C71   | 125.1(6)  |
| P4—Ag7'—Ag9'   | 166.7(5) | C35—C36—C37   | 119.7(8)  |
| P4—Ag7'—Ag8'   | 121.3(4) | C38—C37—C36   | 120.6(8)  |
| Ag9'—Ag7'—Ag8' | 54.8(3)  | C37—C38—C39   | 122.0(8)  |
| P6—Ag8'—Ag9'   | 160.9(5) | C38—C39—C34   | 118.1(7)  |
| P6—Ag8'—Ag7'   | 110.3(4) | C38—C39—C73   | 117.0(7)  |
| Ag9'—Ag8'—Ag7' | 53.7(3)  | C34—C39—C73   | 124.7(7)  |
| Ag7'—Ag9'—Ag8' | 71.5(4)  | C20—C40—C32   | 108.5(8)  |
| P6—Ag1B—P5     | 157.9(6) | N5—C42—C43    | 109.1(5)  |
| P6—Ag1B—Ag5'   | 56.2(3)  | N5—C42—P3     | 124.8(4)  |
| P5—Ag1B—Ag5'   | 103.2(4) | C43—C42—P3    | 125.6(5)  |
| P6—Ag1B—Ag6'   | 113.1(4) | C76'—C43—C75' | 57.2(11)  |
| P5—Ag1B—Ag6'   | 50.0(3)  | C75—C43—C44   | 131.1(11) |
| Ag5'—Ag1B—Ag6' | 80.6(4)  | C76'—C43—C44  | 124.6(12) |

|              |           |              |           |
|--------------|-----------|--------------|-----------|
| O1—S1—O2     | 119.4(7)  | C75'—C43—C44 | 120.4(10) |
| O1—S1—N7     | 114.6(6)  | C75—C43—C76  | 70.3(11)  |
| O2—S1—N7     | 105.0(6)  | C44—C43—C76  | 102.4(9)  |
| O1—S1—C12A   | 106.1(6)  | C75—C43—C42  | 124.6(11) |
| O2—S1—C12A   | 103.9(6)  | C76'—C43—C42 | 128.6(12) |
| N7—S1—C12A   | 106.6(5)  | C75'—C43—C42 | 113.3(9)  |
| F3—C12A—F1   | 108.4(9)  | C44—C43—C42  | 104.0(5)  |
| F3—C12A—F2   | 114.3(9)  | C76—C43—C42  | 107.8(9)  |
| F1—C12A—F2   | 102.0(9)  | C43—C44—C45  | 111.6(5)  |
| F3—C12A—S1   | 113.1(7)  | C77—C45—C44  | 113.4(7)  |
| F1—C12A—S1   | 106.5(7)  | C77—C45—C78  | 109.0(7)  |
| F2—C12A—S1   | 111.6(9)  | C44—C45—C78  | 112.3(7)  |
| F1'—S1'—N7   | 88.4(10)  | C77—C45—N5   | 110.4(6)  |
| F1'—S1'—C12B | 51.3(6)   | C44—C45—N5   | 99.8(5)   |
| N7—S1'—C12B  | 138.6(10) | C78—C45—N5   | 111.7(6)  |
| F1'—S1'—O1   | 127.0(11) | N6—C46—C47   | 110.9(5)  |
| N7—S1'—O1    | 98.1(7)   | N6—C46—P6    | 124.9(5)  |
| C12B—S1'—O1  | 100.0(10) | C47—C46—P6   | 124.1(4)  |
| F1'—S1'—S2   | 120.9(10) | C86—C47—C46  | 114.7(5)  |
| N7—S1'—S2    | 45.2(5)   | C86—C47—C85  | 110.1(6)  |
| C12B—S1'—S2  | 159.7(9)  | C46—C47—C85  | 108.3(5)  |
| O1—S1'—S2    | 98.6(5)   | C86—C47—C48  | 109.9(5)  |
| F2'—C12B—F3' | 91(2)     | C46—C47—C48  | 100.3(5)  |
| F2'—C12B—F1' | 55.3(19)  | C85—C47—C48  | 113.3(5)  |
| F3'—C12B—F1' | 129(2)    | C49—C48—C47  | 108.8(6)  |
| F2'—C12B—S1' | 91.1(17)  | C87—C49—C48  | 111.9(7)  |
| F3'—C12B—S1' | 115.5(18) | C87—C49—N6   | 111.7(7)  |
| F1'—C12B—S1' | 42.0(9)   | C48—C49—N6   | 100.3(5)  |
| S1'—F1'—F2'  | 132.9(18) | C87—C49—C88  | 109.4(6)  |
| S1'—F1'—C12B | 86.7(11)  | C48—C49—C88  | 113.1(7)  |
| F2'—F1'—C12B | 61.9(11)  | N6—C49—C88   | 110.1(6)  |
| F1'—F2'—C12B | 62.8(11)  | C55—C50—C51  | 123.1(13) |
| O3—S2—O4     | 119.7(6)  | C55—C50—N3   | 123.5(10) |
| O3—S2—N7     | 117.3(5)  | C51—C50—N3   | 113.4(10) |
| O4—S2—N7     | 109.6(6)  | C52—C51—C50  | 116.6(13) |

|              |            |                |           |
|--------------|------------|----------------|-----------|
| O3—S2—C119   | 105.5(6)   | C52—C51—C95    | 120.0(11) |
| O4—S2—C119   | 102.9(7)   | C50—C51—C95    | 123.4(10) |
| N7—S2—C119   | 98.3(7)    | C53—C52—C51    | 121.3(15) |
| O3—S2—S1'    | 78.3(5)    | C52—C53—C54    | 120.8(16) |
| O4—S2—S1'    | 126.9(5)   | C55—C54—C53    | 118.8(16) |
| N7—S2—S1'    | 40.4(3)    | C54—C55—C50    | 119.2(15) |
| C119—S2—S1'  | 120.7(6)   | C54—C55—C97    | 119.3(15) |
| O5—S3—O6     | 120.0(6)   | C50—C55—C97    | 121.4(13) |
| O5—S3—N8     | 113.3(5)   | C99—C97—C98    | 90.4(19)  |
| O6—S3—N8     | 113.0(6)   | C99—C97—C55    | 108.0(18) |
| O5—S3—C120   | 107.6(7)   | C98—C97—C55    | 103.7(16) |
| O6—S3—C120   | 98.3(7)    | C97—C99—C98    | 45.2(10)  |
| N8—S3—C120   | 101.3(6)   | N3—C50'—C51'   | 134(2)    |
| O7—S4—O8     | 121.1(6)   | N3—C50'—C55'   | 108.1(17) |
| O7—S4—N8     | 109.5(6)   | C51'—C50'—C55' | 118(2)    |
| O8—S4—N8     | 115.2(5)   | C95—C51'—C50'  | 128(2)    |
| O7—S4—C121   | 100.7(5)   | C95—C51'—C52'  | 117(2)    |
| O8—S4—C121   | 103.3(4)   | C50'—C51'—C52' | 115(2)    |
| N8—S4—C121   | 104.3(5)   | C95—C51'—C11B  | 48.2(14)  |
| C10—P1—Ag1'  | 106.9(3)   | C50'—C51'—C11B | 138.2(18) |
| C10—P1—Ag1   | 114.5(3)   | C52'—C51'—C11B | 85.4(16)  |
| C19—P2—Ag4'  | 98.0(3)    | C95—C51'—C96   | 45.8(14)  |
| C19—P2—Ag2'  | 121.5(3)   | C50'—C51'—C96  | 130.1(17) |
| Ag4'—P2—Ag2' | 78.0(3)    | C52'—C51'—C96  | 94.3(16)  |
| C19—P2—Ag1   | 114.2(2)   | C11B—C51'—C96  | 80.0(12)  |
| C19—P2—Ag2   | 116.3(2)   | C53'—C52'—C51' | 123(3)    |
| Ag1—P2—Ag2   | 129.24(12) | C53'—C52'—C95  | 146(2)    |
| C19—P2—Ag4   | 94.8(2)    | C51'—C52'—C95  | 23.6(11)  |
| Ag1—P2—Ag4   | 107.93(13) | C54'—C53'—C52' | 125(3)    |
| Ag2—P2—Ag4   | 72.74(12)  | C53'—C54'—C55' | 109(2)    |
| C19—P2—Ag1'  | 121.3(3)   | C50'—C55'—C54' | 130(2)    |
| Ag4'—P2—Ag1' | 100.3(3)   | C50'—C55'—C97' | 126(2)    |
| Ag2'—P2—Ag1' | 116.7(2)   | C54'—C55'—C97' | 104(3)    |
| C42—P3—Ag5'  | 112.5(3)   | C55'—C97'—C99' | 114(2)    |
| C42—P3—Ag3   | 111.0(2)   | C55'—C97'—C98  | 129(2)    |

|              |            |               |          |
|--------------|------------|---------------|----------|
| C42—P3—Ag2   | 120.8(2)   | C99'—C97'—C98 | 111(2)   |
| Ag3—P3—Ag2   | 113.65(13) | C65—C64—C69   | 123.0(5) |
| C42—P3—Ag5   | 109.0(2)   | C65—C64—N4    | 119.2(6) |
| Ag3—P3—Ag5   | 73.91(17)  | C69—C64—N4    | 117.8(5) |
| Ag2—P3—Ag5   | 119.09(14) | C66—C65—C64   | 117.0(7) |
| C42—P3—Ag2'  | 117.3(3)   | C66—C65—C100  | 116.9(7) |
| Ag5'—P3—Ag2' | 113.6(4)   | C64—C65—C100  | 126.0(6) |
| C42—P3—Ag3'  | 112.1(3)   | C67—C66—C65   | 121.1(7) |
| Ag5'—P3—Ag3' | 73.5(4)    | C66—C67—C68   | 121.0(7) |
| Ag2'—P3—Ag3' | 120.0(3)   | C69—C68—C67   | 120.7(7) |
| C24—P4—Ag3'  | 107.4(4)   | C68—C69—C64   | 117.1(6) |
| C24—P4—Ag7'  | 122.6(3)   | C68—C69—C102  | 118.4(6) |
| Ag3'—P4—Ag7' | 109.0(4)   | C64—C69—C102  | 124.3(5) |
| C24—P4—Ag6'  | 116.0(3)   | C72—C71—C35   | 111.7(7) |
| Ag3'—P4—Ag6' | 76.4(3)    | C72—C71—C104  | 108.3(7) |
| Ag7'—P4—Ag6' | 114.6(3)   | C35—C71—C104  | 111.3(6) |
| C24—P4—Ag7   | 118.5(3)   | C39—C73—C105  | 110.9(6) |
| C24—P4—Ag6   | 116.5(3)   | C39—C73—C74   | 114.4(6) |
| Ag7—P4—Ag6   | 117.19(13) | C105—C73—C74  | 108.5(6) |
| C24—P4—Ag3   | 106.4(3)   | C43—C75—C76   | 57.8(7)  |
| Ag7—P4—Ag3   | 116.40(14) | C43—C76—C75   | 52.0(6)  |
| Ag6—P4—Ag3   | 72.53(14)  | C76'—C75'—C43 | 60.3(7)  |
| C28—P5—Ag4   | 113.7(2)   | C75'—C76'—C43 | 62.5(8)  |
| C28—P5—Ag6   | 104.7(2)   | C84—C79—C80   | 122.0(5) |
| Ag4—P5—Ag6   | 98.66(15)  | C84—C79—N5    | 118.0(5) |
| C28—P5—Ag1A  | 125.7(2)   | C80—C79—N5    | 120.0(5) |
| Ag4—P5—Ag1A  | 117.14(17) | C81—C80—C79   | 117.8(5) |
| Ag6—P5—Ag1A  | 85.68(16)  | C81—C80—C106  | 119.2(6) |
| C28—P5—Ag1B  | 124.8(4)   | C79—C80—C106  | 123.0(6) |
| C28—P5—Ag6'  | 101.9(3)   | C82—C81—C80   | 121.6(6) |
| Ag1B—P5—Ag6' | 81.8(3)    | C81—C82—C83   | 119.7(6) |
| C28—P5—Ag4'  | 115.4(3)   | C84—C83—C82   | 121.7(6) |
| Ag1B—P5—Ag4' | 116.3(4)   | C83—C84—C79   | 117.0(5) |
| Ag6'—P5—Ag4' | 105.3(3)   | C83—C84—C108  | 118.2(5) |
| C46—P6—Ag8'  | 117.2(3)   | C79—C84—C108  | 124.8(6) |

|              |            |                |           |
|--------------|------------|----------------|-----------|
| C46—P6—Ag1B  | 115.8(4)   | C90—C89—C94    | 120.7(7)  |
| Ag8'—P6—Ag1B | 116.7(4)   | C90—C89—N6     | 119.8(6)  |
| C46—P6—Ag5   | 107.7(2)   | C94—C89—N6     | 119.6(6)  |
| C46—P6—Ag8   | 120.7(2)   | C91—C90—C89    | 118.4(7)  |
| Ag5—P6—Ag8   | 115.11(14) | C91—C90—C110   | 117.3(8)  |
| C46—P6—Ag1A  | 112.4(2)   | C89—C90—C110   | 124.1(7)  |
| Ag5—P6—Ag1A  | 77.72(17)  | C90—C91—C92    | 123.5(9)  |
| Ag8—P6—Ag1A  | 115.17(15) | C93—C92—C91    | 117.1(9)  |
| C46—P6—Ag5'  | 107.8(3)   | C92—C93—C94    | 123.0(8)  |
| Ag8'—P6—Ag5' | 117.6(4)   | C93—C94—C89    | 117.1(7)  |
| Ag1B—P6—Ag5' | 74.2(4)    | C93—C94—C112   | 119.1(7)  |
| C10—N1—C1    | 123.0(6)   | C89—C94—C112   | 123.8(7)  |
| C10—N1—C7    | 114.0(7)   | C51'—C95—C96   | 109.7(18) |
| C1—N1—C7     | 123.0(6)   | C51'—C95—C11B  | 106.6(19) |
| C19—N2—C34   | 125.1(6)   | C96—C95—C11B   | 113.3(12) |
| C19—N2—C20   | 112.7(6)   | C96—C95—C11A   | 93.5(14)  |
| C34—N2—C20   | 121.9(5)   | C96—C95—C51    | 112.3(9)  |
| C24—N3—C50'  | 119.2(11)  | C11A—C95—C51   | 136.5(16) |
| C24—N3—C50   | 122.6(7)   | C51'—C95—C52'  | 39.6(15)  |
| C24—N3—C25   | 113.8(7)   | C96—C95—C52'   | 92.0(12)  |
| C50'—N3—C25  | 123.3(11)  | C11B—C95—C52'  | 82.6(12)  |
| C50—N3—C25   | 123.0(7)   | C95—C96—C51'   | 24.5(8)   |
| C28—N4—C64   | 124.9(4)   | C97—C98—C99    | 44.4(10)  |
| C28—N4—C31   | 114.1(5)   | C65—C100—C101  | 113.9(6)  |
| C64—N4—C31   | 120.8(4)   | C65—C100—C114  | 111.7(6)  |
| C42—N5—C79   | 124.3(5)   | C101—C100—C114 | 108.9(6)  |
| C42—N5—C45   | 114.5(5)   | C69—C102—C103  | 113.2(6)  |
| C79—N5—C45   | 121.2(5)   | C69—C102—C115  | 110.1(5)  |
| C46—N6—C89   | 125.5(5)   | C103—C102—C115 | 107.6(6)  |
| C46—N6—C49   | 113.6(6)   | C80—C106—C107  | 112.5(6)  |
| C89—N6—C49   | 120.8(5)   | C80—C106—C116  | 110.6(5)  |
| S1'—N7—S2    | 94.5(7)    | C107—C106—C116 | 108.5(6)  |
| S1—N7—S2     | 122.9(7)   | C84—C108—C109  | 111.7(6)  |
| S3—N8—S4     | 126.1(5)   | C84—C108—C117  | 111.5(5)  |
| C2—C1—C6     | 122.8(8)   | C109—C108—C117 | 109.1(6)  |



|             |           |                |           |
|-------------|-----------|----------------|-----------|
| C2—C1—N1    | 120.4(8)  | C90—C110—C122  | 109.6(9)  |
| C6—C1—N1    | 116.8(7)  | C90—C110—C111  | 110.1(8)  |
| C1—C2—C3    | 116.7(11) | C122—C110—C111 | 112.3(8)  |
| C1—C2—C11   | 124.6(7)  | C94—C112—C113  | 110.5(7)  |
| C3—C2—C11   | 118.7(9)  | C94—C112—C118  | 111.5(6)  |
| C4—C3—C2    | 121.2(11) | C113—C112—C118 | 109.3(6)  |
| C3—C4—C5    | 121.7(11) | C95—C11B—C51'  | 25.2(8)   |
| C6—C5—C4    | 120.1(13) | F5—C119—F4     | 108.7(13) |
| C5—C6—C1    | 116.9(10) | F5—C119—F6     | 107.4(12) |
| C5—C6—C13   | 118.6(11) | F4—C119—F6     | 104.3(11) |
| C1—C6—C13   | 124.4(7)  | F5—C119—S2     | 116.2(10) |
| N1—C7—C15   | 111.5(7)  | F4—C119—S2     | 111.7(9)  |
| N1—C7—C16   | 110.6(6)  | F6—C119—S2     | 107.8(11) |
| C15—C7—C16  | 109.3(8)  | F7—C120—F9     | 108.6(12) |
| N1—C7—C8    | 98.8(8)   | F7—C120—F10    | 102.8(13) |
| C15—C7—C8   | 111.4(8)  | F9—C120—F10    | 108.4(13) |
| C16—C7—C8   | 115.0(8)  | F7—C120—S3     | 112.6(12) |
| C9—C8—C7    | 110.6(8)  | F9—C120—S3     | 113.7(11) |
| C8—C9—C10   | 99.4(7)   | F10—C120—S3    | 110.1(9)  |
| C8—C9—C17   | 98.5(16)  | F8—C121—F11    | 99.3(9)   |
| C10—C9—C17  | 121.9(13) | F8—C121—F12    | 106.9(10) |
| C8—C9—C17'  | 122.1(12) | F11—C121—F12   | 105.5(8)  |
| C10—C9—C17' | 103.4(10) | F8—C121—S4     | 113.1(7)  |
| C8—C9—C18   | 112.6(8)  | F11—C121—S4    | 116.2(8)  |
| C10—C9—C18  | 112.2(9)  | F12—C121—S4    | 114.4(7)  |
| C17—C9—C18  | 110.5(12) |                |           |

## S8. Computational Analyses

With the use of DFT, the complexes are optimized using hybrid functional UBP86<sup>8,9</sup> along with the dispersion correction term (D3(BJ))<sup>10,11</sup>, and the Ahlrichs triple- $\zeta$ -quality basis set def2-SVP<sup>12</sup> using the Gaussian09<sup>13</sup> package in the gaseous phase. The NBO 6.0 program<sup>14-16</sup> is used to perform the NBO<sup>14-16</sup> calculations of the complexes,

spin densities, mulliken charges, HOMO-LUMO energy gap and natural bond orbitals at BP86-D3(BJ)/Def2-TZVPP.

### S8.1. NBO Analysis

The NBO Analysis of **2** and **4** at neutral doublet state and dicationic triplet state respectively were performed at UBP86-D3(BJ)/Def2-SVP level of theory.

The Kohn-Sham orbitals of **2**,  $\alpha$ -SOMO-3 and  $\beta$ -SOMO-3 represents the lone pair present in the P atoms. The  $\alpha$ -SOMO-2 and  $\beta$ -SOMO-2 shows the  $\pi$  backdonation from the P–C<sub>cAAC</sub>. While the  $\alpha$ -LUMO+1 and  $\beta$ -LUMO+1 depicts the antibonding orbitals  $\pi_{C=N}$ . The P–C<sub>cAAC</sub> bond shows two occupancies, where one bond is polarized towards C (62.91%) and other is polarized towards P (59.79%). This might be the presence of a double bond between them which is depicted in  $\alpha$ -SOMO-2 and  $\beta$ -SOMO-2 (Figure S8), where the lone pairs on P atoms are slightly extended towards C<sub>cAAC</sub>. The presence of lone pair on the P<sub>281</sub>, P<sub>171</sub> atoms is evident from the above given NBO results (Table S2).  $\alpha$ -SOMO-1 and  $\alpha$ -SOMO represents  $\pi^*$  antibonding orbitals of C=N.

The Kohn-Sham orbitals of **4**  $\alpha$ -SOMO-2 shows the lone pair on P atom and also  $\pi$  backdonation from P to C<sub>cAAC</sub>. The  $\pi$  backdonation from P to C<sub>cAAC</sub> can also be visualized in  $\beta$ -SOMO-3 and  $\beta$ -LUMO. The  $\alpha$ -SOMO-1 and  $\beta$ -SOMO shows the interaction of  $\pi$ -type lone pair of P with Ag.  $\alpha$ -SOMO and  $\alpha$ -LUMO depicts the  $\pi^*$  antibonding orbitals of C=N. The  $\beta$ -SOMO-1 flaunts the Ag–Ag–Ag metal interaction.

The Mulliken spin densities are primarily located on the C<sub>cAAC</sub> ligands and to a lesser extent on the Ag and N atoms in **2**. In **4**, the significant contribution to the spin density comes from the P atom and Ag, with relevant contributions also observed from the C<sub>cAAC</sub> ligands.

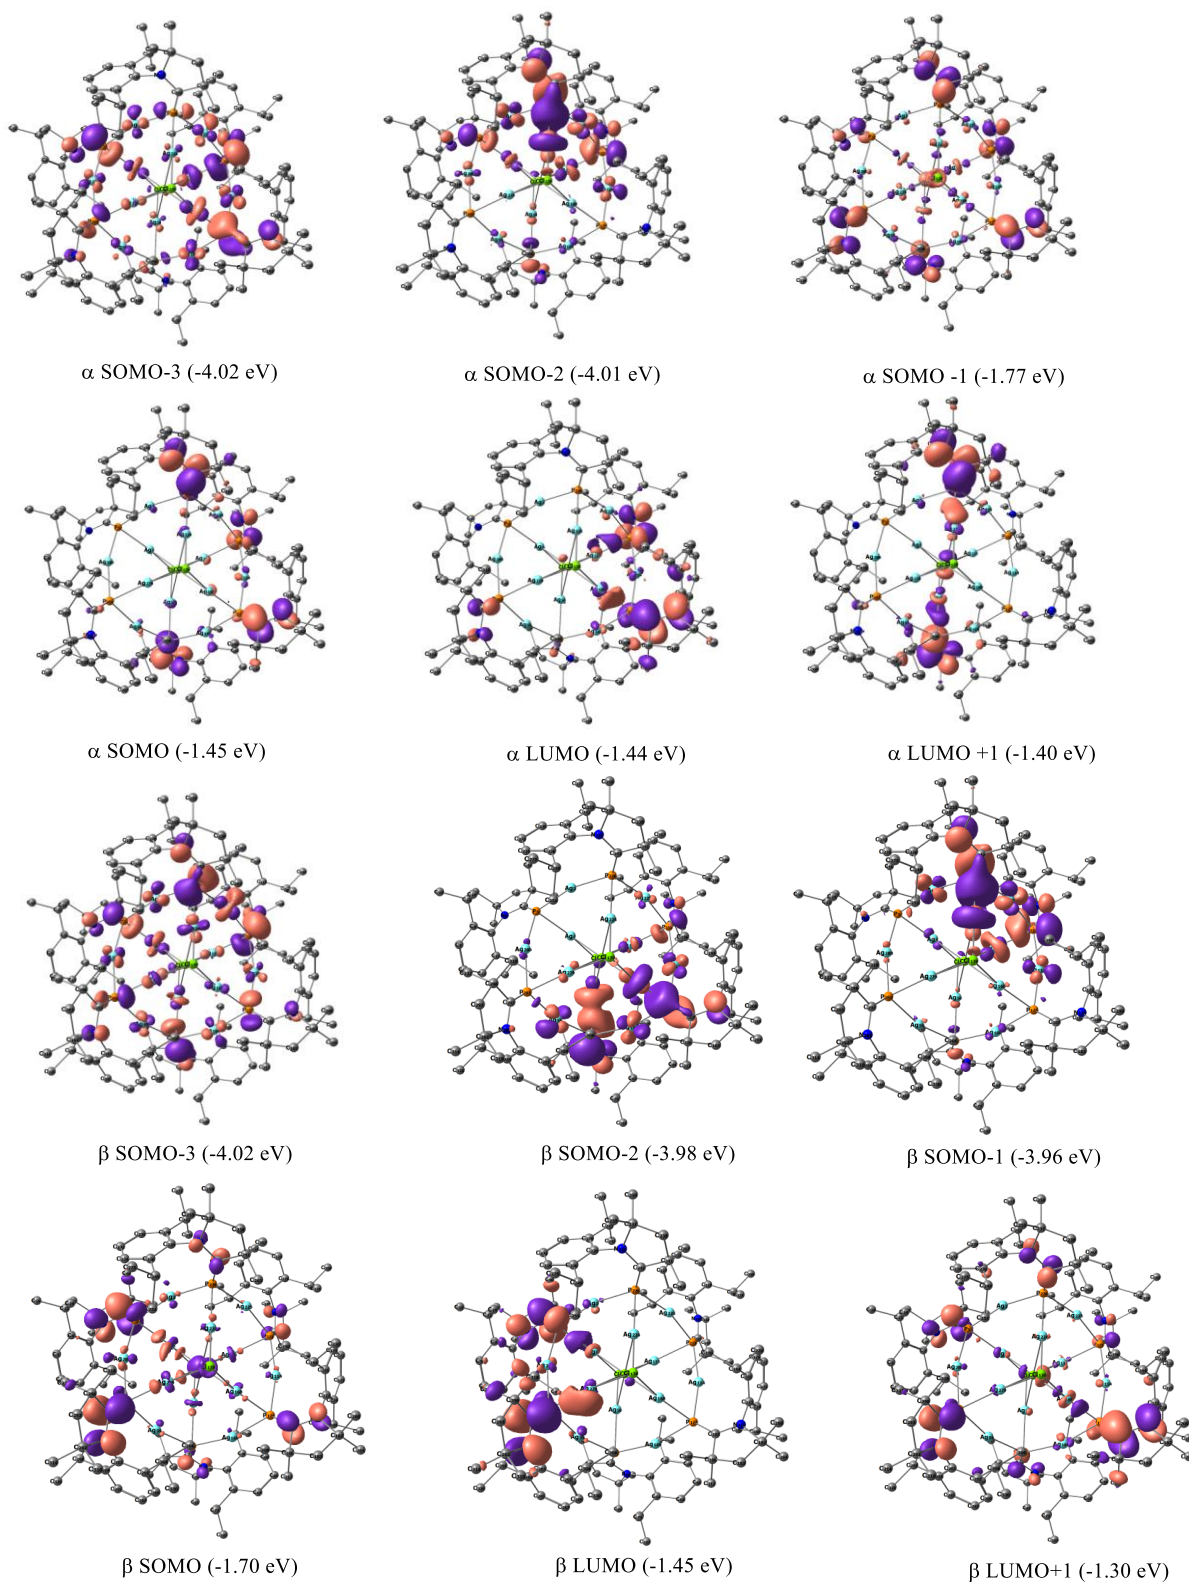

**Figure S9.** The selected Kohn-Sham orbitals ( $\alpha/\beta$ -SOMO-3,  $\alpha/\beta$ -SOMO-2,  $\alpha/\beta$ -SOMO-1,  $\alpha/\beta$  SOMO,  $\alpha/\beta$  LUMO and a/b LUMO+1) of **2** in neutral doublet state at UBP86-D3(BJ)/Def2-SVP level of theory.

**Table S2.** Natural Bond Orbital (NBO) analysis of the **2** at UBP86-D3(BJ)/Def2-SVP level of theory. Occupation Number (ON) and Polarization and Hybridization.

| Bond                                                       | ON    | Polarization and Hybridization (%)               |                                              |                                            |
|------------------------------------------------------------|-------|--------------------------------------------------|----------------------------------------------|--------------------------------------------|
| Ag <sub>224</sub> -Ag <sub>225</sub> -<br>P <sub>226</sub> | 0.906 | Ag:10.2<br>s (51.72)<br>p (46.86)<br>d (1.40)    | Ag:12.54<br>s (42.02)<br>p (56.37)<br>(1.54) | P:77.24<br>s (35.10) p (64.87)<br>d (0.03) |
| P <sub>226</sub> -C <sub>242</sub>                         | 0.979 | P:37.09<br>s (21.74) p (77.81) d (0.45)          |                                              | C:62.91<br>s (38.20) p (61.76)<br>d (0.04) |
|                                                            | 0.91  | P:59.79<br>s (3.81) p (95.95) d (0.24)           |                                              | C:40.21<br>s (0.50) p (99.46) d<br>(0.04)  |
| P Lone pair                                                | 0.715 | P <sub>281</sub><br>s (36.78) p (63.19) d (0.03) |                                              |                                            |
|                                                            | 0.772 | P <sub>171</sub><br>s (3.47) p (96.52)           |                                              |                                            |
|                                                            | 0.702 | P <sub>171</sub><br>s (60.77) p (39.20)          |                                              |                                            |

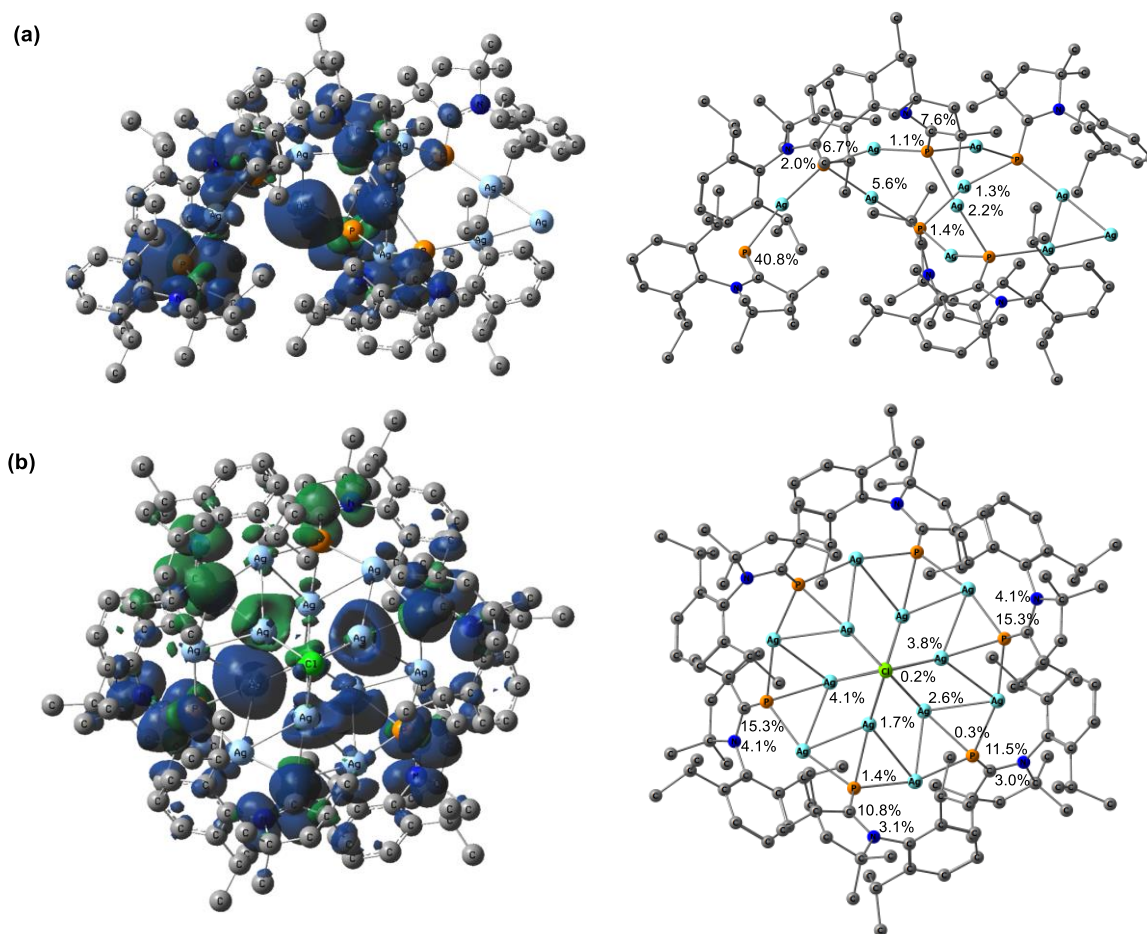

**Figure S10.** Mulliken  $\alpha$ -spin densities of **2** (top) and **4** (bottom). The individual contribution of selected atoms to the total  $\alpha$ -spin density are in %.

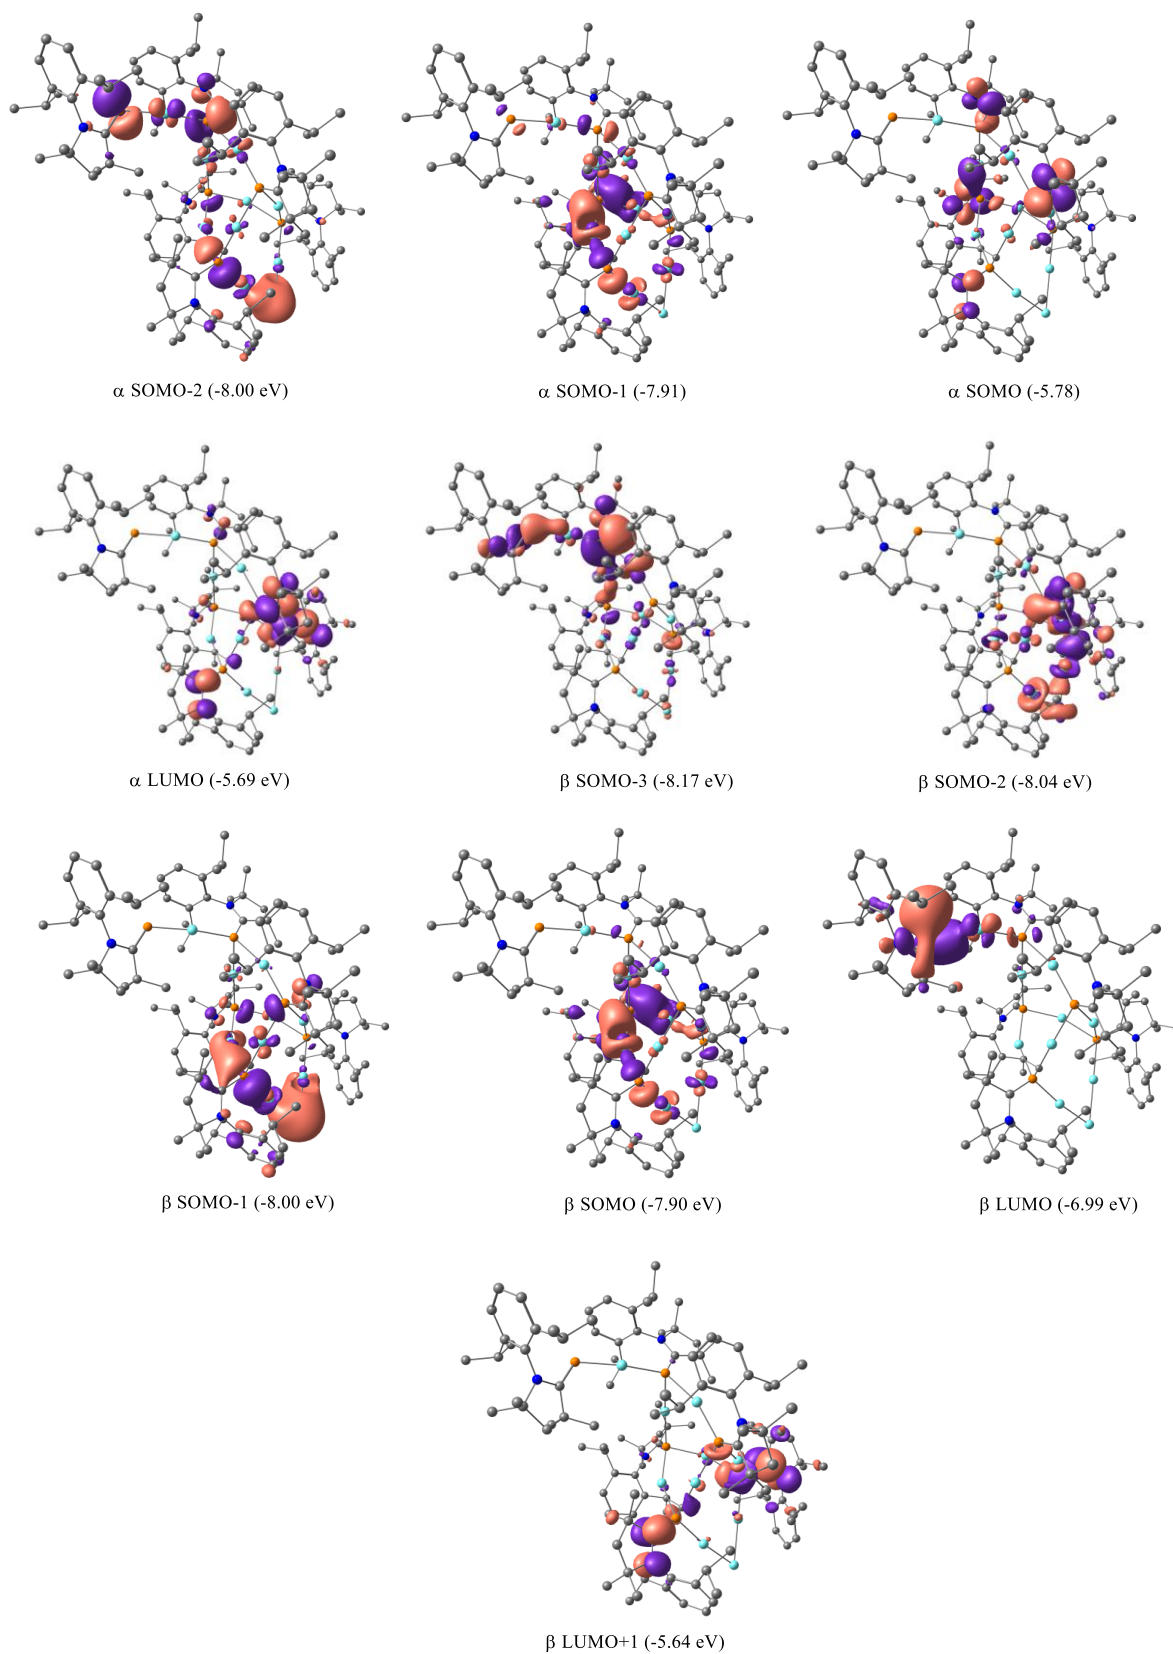

**Figure S11.** The selected Kohn-Sham orbitals ( $\alpha/\beta$ -SOMO -3,  $\alpha/\beta$ -SOMO-2,  $\alpha/\beta$ -LUMO+1) of **4** in dicationic triplet state at UBP86-D3(BJ)/Def2-SVP level of theory.

**Table S3.** Natural Bond Orbital (NBO) analysis of **4** at UBP86-D3(BJ)/Def2-SVP level of theory. Occupation Number (ON) and Polarization and Hybridization

| Bond                                               | ON    | Polarization and Hybridization (%)             |                                                | WBI                                                                                                                                         |
|----------------------------------------------------|-------|------------------------------------------------|------------------------------------------------|---------------------------------------------------------------------------------------------------------------------------------------------|
| Ag <sub>1</sub> -P <sub>12</sub>                   | 0.93  | Ag:18.91<br>s (88.90) p (7.14) d (3.95)        |                                                | P:81.09<br>s (37.49)<br>p (62.48) d<br>(0.03)<br>0.51                                                                                       |
| Ag <sub>2</sub> -Ag <sub>4</sub> -P <sub>12</sub>  | 0.913 | Ag:11.35<br>s (41.93) p<br>(56.66) d<br>(1.32) | Ag:7.91<br>s (25.98) p<br>(73.23) d<br>(0.75)  | P:80.75<br>s (41.66) p<br>(58.31) d<br>(0.03)<br>Ag <sub>4</sub> -P <sub>12</sub><br>=0.44<br>Ag <sub>2</sub> -P <sub>15</sub> =<br>0.49    |
| Ag <sub>2</sub> -Ag <sub>4</sub> -P <sub>15</sub>  | 0.89  | Ag:1.79<br>s (0.41) p<br>(99.41) d<br>(0.17)   | Ag:15.14<br>s (69.19) p<br>(28.08) d<br>(2.69) | P:83.07<br>s (33.88) p<br>(66.10) d (0.03)<br>Ag <sub>4</sub> -P <sub>15</sub> =<br>0.49                                                    |
| Ag <sub>2</sub> -P <sub>13</sub>                   | 0.90  | Ag:12.86<br>s (54.10) p (43.06) d (2.77)       |                                                | P:87.14<br>s (39.30) p<br>(60.68) d<br>(0.02)<br>0.47                                                                                       |
| Ag <sub>3</sub> -Ag <sub>5</sub> -P <sub>13</sub>  | 0.92  | Ag:11.57<br>s (47.88) p<br>(50.47) d<br>(1.63) | Ag:11.76<br>s (48.21) p<br>(50.47) d<br>(1.53) | P:76.67 s<br>(39.10) p<br>(60.87) d<br>(0.03)<br>Ag <sub>5</sub> -P <sub>13</sub><br>=0.45<br>Ag <sub>3</sub> -P <sub>13</sub> =0.48        |
| Ag <sub>3</sub> -Ag <sub>6</sub> -P <sub>14</sub>  | 0.93  | Ag:10.59<br>s (41.25) p<br>(57.43) d<br>(1.31) | Ag:13.96<br>s (77.40) p<br>(20.10) d<br>(2.49) | P:75.45<br>s (35.25) p<br>(64.72) d<br>(0.04)<br>Ag <sub>3</sub> -P <sub>14</sub> =0.45<br>Ag <sub>6</sub> -P <sub>14</sub> =<br>0.44       |
| Ag <sub>5</sub> -Ag <sub>10</sub> -P <sub>16</sub> | 0.92  | Ag:10.88<br>S (44.42) p<br>(54.04) d<br>(1.52) | Ag:10.71 s<br>(34.21) p<br>(64.34) d<br>(1.42) | P:78.41<br>s (37.92) p<br>(62.05) d<br>(0.03)<br>Ag <sub>5</sub> -<br>P <sub>16</sub> =0.452<br>Ag <sub>10</sub> -<br>P <sub>16</sub> =0.47 |

|                                                   |      |                                                |                                                |                                               |      |
|---------------------------------------------------|------|------------------------------------------------|------------------------------------------------|-----------------------------------------------|------|
| Ag <sub>7</sub> -Ag <sub>8</sub> -Ag <sub>9</sub> | 0.93 | Ag:27.73 s<br>(40.65) p<br>(58.62) d<br>(0.73) | Ag:27.22 s<br>(41.02) p<br>(58.40) d<br>(0.57) | Ag:45.05 s<br>(94.82) p (4.99)<br>d (0.19)    |      |
| Ag <sub>7</sub> -P <sub>14</sub>                  | 0.91 | Ag:12.63<br>s (56.60) p (40.67) d (2.71)       |                                                | P:87.73<br>s (43.82) p<br>(56.16) d<br>(0.02) | 0.44 |
| Ag <sub>8</sub> -P <sub>16</sub>                  | 0.91 | Ag:12.27<br>s (55.67) p (41.78) d (2.51)       |                                                | P:87.73 s<br>(42.19) p<br>(57.81) d<br>(0.01) | 0.43 |
| Ag <sub>10</sub> -P <sub>15</sub>                 | 0.89 | Ag: 13.51<br>s (60.65) p (36.53) d (2.78)      |                                                | P:86.49 s<br>(18.16) p<br>(67.88) d<br>(0.03) | 0.50 |
| P <sub>11</sub> -C <sub>37</sub>                  | 0.98 | P:32.92<br>s (18.16) p (81.23) d (0.61)        |                                                | C:67.08 s<br>(36.51) p<br>(63.44) d<br>(0.04) | 1.30 |
| P <sub>12</sub> -C <sub>66</sub>                  | 0.98 | P:37.49<br>s (21.32) p (78.20) d (0.48)        |                                                | C:62.51 s<br>(36.99) p<br>(62.96) d<br>(0.05) | 1.21 |
| P <sub>13</sub> -C <sub>113</sub>                 | 0.98 | P:37.65<br>s (22.04) p (77.49) d (0.47)        |                                                | C:63.23 s<br>(37.46) p<br>(62.50) d<br>(0.04) | 0.60 |
| P <sub>14</sub> -C <sub>80</sub>                  | 0.98 | P:36.77<br>s (21.27) p (78.24) d (0.48)        |                                                | C:63.23 s<br>(37.13) p<br>(62.82) d<br>(0.04) | 1.25 |



|                                   |      |                                         |                                               |      |
|-----------------------------------|------|-----------------------------------------|-----------------------------------------------|------|
| P <sub>15</sub> -C <sub>86</sub>  | 0.98 | P:38.50<br>s (23.30) p (76.34) d (0.45) | C:61.50 s<br>(36.89) p<br>(63.05) d<br>(0.05) | 1.17 |
| P <sub>16</sub> -C <sub>119</sub> | 0.98 | P:36.96<br>s (20.41) p (79.11)          | C:63.04 s<br>(37.58) p<br>(62.37) d<br>(0.04) | 1.24 |
| P-LonePairs                       | 0.94 | P <sub>11</sub><br>47.49 52.56          |                                               |      |
|                                   | 0.79 | P <sub>12</sub><br>s (31.81) p (68.17)  |                                               |      |
|                                   | 0.66 | P <sub>12</sub><br>s (5.81) p (94.11)   |                                               |      |
|                                   | 0.69 | P <sub>13</sub><br>s (0.10) p (99.83)   |                                               |      |
|                                   | 0.68 | P <sub>14</sub><br>s (0.24) p (99.67)   |                                               |      |
|                                   | 0.69 | P <sub>15</sub><br>s (10.77) p (89.18)  |                                               |      |
|                                   | 0.68 | P <sub>16</sub><br>s (0.01) p (99.90)   |                                               |      |

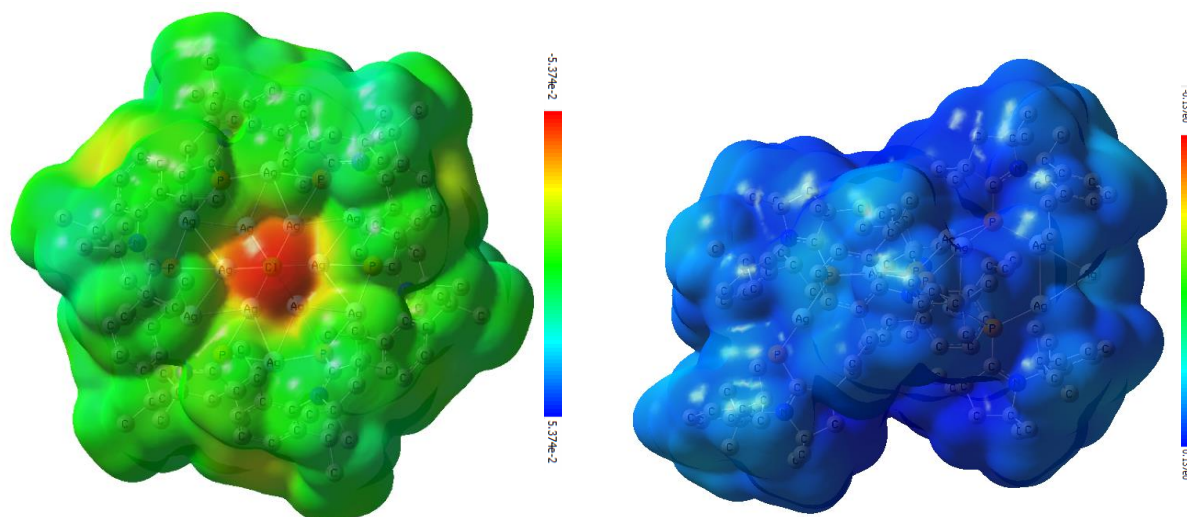

**Figure S12.** MEP plots of nanoclusters **2** and **4** at UBP86-D3(BJ)/Def2-SVP level of theory.

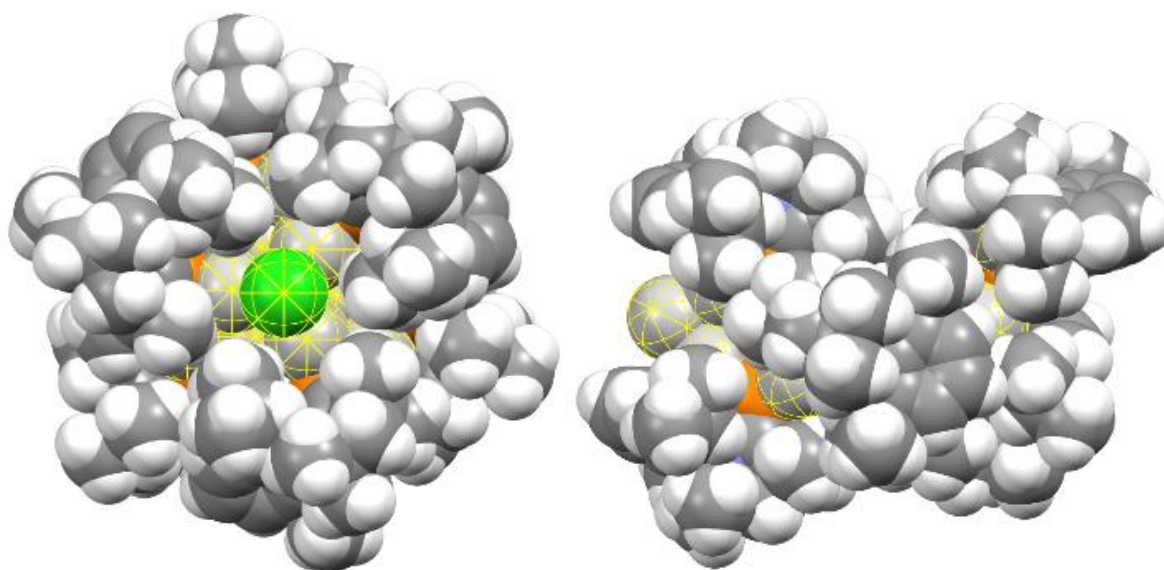

**Figure S13.** Space filling models of total molecule of  $[(\text{Me}_2\text{-cAAC}=\text{P})_6\text{Ag}_{12}\text{Cl}_3]$  (**2**) (left) and  $[(\text{Me}_2\text{-cAAC}=\text{P})_6\text{Ag}_{10}](\text{NTf}_2)_2$  (**4**) (right).

### Coordinates of nanoclusters **2** and **4**

#### Nanocluster **2**

|    |              |              |              |
|----|--------------|--------------|--------------|
| Ag | 0.932164102  | 1.826751953  | 1.362871102  |
| Ag | -0.076198112 | 4.188880969  | 0.050865007  |
| Cl | 0.000219021  | 0.000269973  | -0.000227997 |
| Cl | -0.001154055 | -0.000962943 | 2.934417214  |

|   |             |             |              |
|---|-------------|-------------|--------------|
| P | 2.176060379 | 3.868002824 | 0.817019060  |
| N | 3.895569757 | 4.622251428 | 2.824421208  |
| C | 4.995617490 | 3.915376914 | 2.163127160  |
| C | 5.659692974 | 4.558753233 | 1.109819081  |
| C | 6.721156759 | 3.868695088 | 0.489203038  |
| H | 7.229293232 | 4.315840958 | -0.302874019 |
| C | 7.116935091 | 2.569121719 | 0.919527069  |
| H | 7.908882658 | 2.071751113 | 0.462431036  |
| C | 6.414460548 | 1.990883759 | 1.961110146  |
| H | 6.693597313 | 1.040623568 | 2.283278166  |
| C | 5.333132084 | 2.620053119 | 2.606303189  |
| C | 4.102981007 | 5.490283757 | 4.053400295  |
| C | 2.658572481 | 5.809591373 | 4.390590318  |
| H | 2.391346654 | 5.307206738 | 5.276879384  |
| H | 2.561039896 | 6.843774430 | 4.568462334  |
| C | 1.737950428 | 5.402165796 | 3.285321241  |
| C | 2.628716512 | 4.587109117 | 2.350040173  |
| C | 5.282259979 | 5.928681495 | 0.534456041  |
| H | 4.475916700 | 6.316394955 | 1.095355079  |
| C | 4.829917313 | 5.787916220 | -0.944042063 |
| H | 4.497224498 | 6.720803692 | -1.296935093 |
| H | 4.046468449 | 5.089886205 | -1.005610068 |
| H | 5.638633254 | 5.459689586 | -1.529772108 |
| C | 4.570991939 | 1.868647799 | 3.656177267  |
| H | 3.851381562 | 2.515648982 | 4.080627295  |
| C | 3.834345325 | 0.636570888 | 3.055248224  |
| H | 3.431355783 | 0.057535558 | 3.833580278  |
| H | 4.512598833 | 0.057028249 | 2.500428183  |
| H | 3.057775146 | 0.960712532 | 2.425258179  |
| C | 4.788736703 | 4.685501657 | 5.187424378  |
| H | 5.199957512 | 5.350415489 | 5.890028431  |
| H | 5.553917321 | 4.091012685 | 4.782726345  |
| H | 4.081829846 | 4.069010961 | 5.659534432  |
| C | 4.913502897 | 6.743070147 | 3.690342268  |

|    |              |              |              |
|----|--------------|--------------|--------------|
| H  | 4.850929508  | 7.437997035  | 4.476369326  |
| H  | 4.526985024  | 7.169567907  | 2.812921208  |
| H  | 5.919799890  | 6.480681418  | 3.536023260  |
| C  | 0.601572729  | 4.576785435  | 3.832059279  |
| H  | 0.096596201  | 4.095941368  | 3.045324224  |
| H  | -0.074927269 | 5.197288966  | 4.346463318  |
| H  | 0.982170411  | 3.853732041  | 4.492239325  |
| C  | 1.372705094  | 6.734269295  | 2.384613175  |
| H  | 1.438538426  | 6.495037256  | 1.365484100  |
| H  | 2.052250164  | 7.500991671  | 2.615288190  |
| H  | 0.394302475  | 7.051453322  | 2.606458190  |
| C  | 6.472621149  | 6.908459575  | 0.634869048  |
| H  | 6.129392393  | 7.890973660  | 0.480794038  |
| H  | 7.189618644  | 6.671000545  | -0.095525004 |
| H  | 6.908802958  | 6.839730775  | 1.588236119  |
| C  | 5.503032007  | 1.379513604  | 4.763709344  |
| H  | 4.939455660  | 1.129892150  | 5.615039410  |
| H  | 6.192118313  | 2.133417403  | 5.011848362  |
| H  | 6.028146921  | 0.529917340  | 4.434216321  |
| Ag | 1.115888506  | -1.721612572 | 1.361899104  |
| Ag | 3.666298877  | -2.028492005 | 0.051004007  |
| P  | 2.262141954  | -3.819211025 | 0.814917062  |
| N  | 2.053928444  | -5.686143369 | 2.823996205  |
| C  | 0.891620616  | -6.285282137 | 2.163182157  |
| C  | 1.115846547  | -7.183458968 | 1.110884082  |
| C  | -0.013118742 | -7.757569769 | 0.490920038  |
| H  | 0.119441502  | -8.422300956 | -0.300338019 |
| C  | -1.336281908 | -7.448831622 | 0.921068070  |
| H  | -2.163430764 | -7.885815928 | 0.464593036  |
| C  | -1.484906794 | -6.549964426 | 1.961624147  |
| H  | -2.447191475 | -6.315319402 | 2.283609167  |
| C  | -0.398615586 | -5.928279003 | 2.605990191  |
| C  | 2.701888941  | -6.298432192 | 4.053496293  |
| C  | 3.701056948  | -5.207007370 | 4.389345318  |

|   |              |              |              |
|---|--------------|--------------|--------------|
| H | 3.399794583  | -4.723438860 | 5.275207385  |
| H | 4.645362483  | -5.639739340 | 4.567526330  |
| C | 3.808797288  | -4.206920902 | 3.283213237  |
| C | 2.657674859  | -4.571312334 | 2.348456171  |
| C | 2.490627572  | -7.543481323 | 0.535975044  |
| H | 3.230014561  | -7.039024642 | 1.096308080  |
| C | 2.595375806  | -7.083239676 | -0.943011067 |
| H | 3.569488863  | -7.262855453 | -1.295686091 |
| H | 2.383524806  | -6.055658635 | -1.005601067 |
| H | 1.906298866  | -7.619509488 | -1.528177105 |
| C | -0.666964987 | -4.890905473 | 3.654579268  |
| H | 0.253567429  | -4.591704905 | 4.078487297  |
| C | -1.364321127 | -3.636769612 | 3.052020221  |
| H | -1.663435905 | -2.996864220 | 3.829548280  |
| H | -2.205762420 | -3.934005033 | 2.497591184  |
| H | -0.694822878 | -3.127982631 | 2.421310178  |
| C | 1.662271212  | -6.488467415 | 5.188032376  |
| H | 2.032392052  | -7.176352171 | 5.891418421  |
| H | 0.764720721  | -6.854111431 | 4.783879348  |
| H | 1.482138684  | -5.567444309 | 5.659131411  |
| C | 3.381186499  | -7.627304957 | 3.691743270  |
| H | 4.014404599  | -7.919891768 | 4.477956323  |
| H | 3.943617924  | -7.506853420 | 2.814053208  |
| H | 2.650582042  | -8.367584187 | 3.538395260  |
| C | 3.662640961  | -2.809744837 | 3.829173279  |
| H | 3.498672485  | -2.132470731 | 3.042034223  |
| H | 4.538444940  | -2.533948530 | 4.343311316  |
| H | 2.846268894  | -2.777263768 | 4.489449328  |
| C | 5.144827900  | -4.557320867 | 2.382254172  |
| H | 4.904164692  | -4.495236098 | 1.363064103  |
| H | 5.468832340  | -5.529095786 | 2.613481192  |
| H | 5.909146176  | -3.868764686 | 2.603184192  |
| C | 2.742545322  | -9.064379864 | 0.638170051  |
| H | 3.764869427  | -9.259556574 | 0.484366038  |

|    |              |              |              |
|----|--------------|--------------|--------------|
| H  | 2.177945461  | -9.566918278 | -0.091649004 |
| H  | 2.464570328  | -9.406350872 | 1.591934115  |
| C  | -1.557059403 | -5.451013937 | 4.763004348  |
| H  | -1.490620750 | -4.837105954 | 5.613542420  |
| H  | -1.249760094 | -6.424750823 | 5.012339364  |
| H  | -2.555473269 | -5.480266696 | 4.433720323  |
| Ag | -2.049171681 | -0.106497353 | 1.360797103  |
| Ag | -3.589240753 | -2.160430060 | 0.047278006  |
| P  | -4.438847378 | -0.049836798 | 0.812948062  |
| N  | -5.954786603 | 1.057550249  | 2.823163206  |
| C  | -5.892217267 | 2.366687513  | 2.168081158  |
| C  | -6.779471562 | 2.624612944  | 1.114169082  |
| C  | -6.712186781 | 3.892133910  | 0.499964039  |
| H  | -7.351955354 | 4.112247160  | -0.292320018 |
| C  | -5.785887989 | 4.882937175  | 0.937330068  |
| H  | -5.750644520 | 5.819776077  | 0.485036038  |
| C  | -4.935942770 | 4.559021028  | 1.979262143  |
| H  | -4.253826824 | 5.274790250  | 2.306501168  |
| C  | -4.940806692 | 3.304740231  | 2.618366192  |
| C  | -6.811706553 | 0.797890784  | 4.050052297  |
| C  | -6.366066124 | -0.613802650 | 4.382085318  |
| H  | -5.798529081 | -0.597422455 | 5.269180384  |
| H  | -7.212928108 | -1.216398760 | 4.556428330  |
| C  | -5.551306149 | -1.202464661 | 3.275478237  |
| C  | -5.290182603 | -0.019864586 | 2.345159170  |
| C  | -7.775243548 | 1.614890936  | 0.531831041  |
| H  | -7.708276432 | 0.719981764  | 1.088504081  |
| C  | -7.423965741 | 1.301076370  | -0.947522064 |
| H  | -8.064237986 | 0.547761578  | -1.305450089 |
| H  | -6.427399831 | 0.972703228  | -1.008658071 |
| H  | -7.543504554 | 2.168297766  | -1.529260108 |
| C  | -3.911488345 | 3.015644085  | 3.669685268  |
| H  | -4.112773554 | 2.066702360  | 4.088815297  |
| C  | -2.474326346 | 2.997627949  | 3.073294226  |

|    |              |              |              |
|----|--------------|--------------|--------------|
| H  | -1.773988155 | 2.934629996  | 3.853723283  |
| H  | -2.310128371 | 3.877539947  | 2.523356184  |
| H  | -2.364014300 | 2.166582126  | 2.439472176  |
| C  | -6.459287735 | 1.789313245  | 5.188881377  |
| H  | -7.241665555 | 1.809849227  | 5.890576447  |
| H  | -6.326655754 | 2.750917181  | 4.788442348  |
| H  | -5.572513456 | 1.483483837  | 5.660879389  |
| C  | -8.301435973 | 0.874877151  | 3.685255266  |
| H  | -8.872939834 | 0.469879168  | 4.468835324  |
| H  | -8.476391338 | 0.330615839  | 2.805270204  |
| H  | -8.577249452 | 1.878176138  | 3.534806258  |
| C  | -4.268848197 | -1.775550350 | 3.821442280  |
| H  | -3.598777014 | -1.969023458 | 3.034796222  |
| H  | -4.468368298 | -2.673798181 | 4.331984314  |
| H  | -3.834046938 | -1.086930964 | 4.484948326  |
| C  | -6.520900265 | -2.181342271 | 2.369512171  |
| H  | -6.345478166 | -2.000468016 | 1.351155102  |
| H  | -7.524852802 | -1.977166686 | 2.600011192  |
| H  | -6.306595968 | -3.188149486 | 2.587330189  |
| C  | -9.219579561 | 2.154289550  | 0.631897046  |
| H  | -9.897951932 | 1.366048097  | 0.472556037  |
| H  | -9.371456977 | 2.897408922  | -0.095184004 |
| H  | -9.380437591 | 2.561617446  | 1.586934115  |
| C  | -3.957569190 | 4.061835989  | 4.782287345  |
| H  | -3.461852670 | 3.694640563  | 5.633263428  |
| H  | -4.955830886 | 4.279935228  | 5.028628366  |
| H  | -3.483852103 | 4.943229006  | 4.458470324  |
| Ag | -0.931503086 | -1.826627025 | -1.363030093 |
| Ag | 0.076768124  | -4.188818029 | -0.050961001 |
| Cl | 0.001864050  | 0.000745872  | -2.934630208 |
| P  | -2.175565370 | -3.868012878 | -0.817215056 |
| N  | -3.891629741 | -4.622122695 | -2.825688202 |
| C  | -4.992765442 | -3.914760116 | -2.166404153 |
| C  | -5.658429881 | -4.557252338 | -1.113598079 |

|   |              |              |              |
|---|--------------|--------------|--------------|
| C | -6.720615622 | -3.866372148 | -0.495305032 |
| H | -7.230060010 | -4.312625936 | 0.296416025  |
| C | -7.115312951 | -2.567093843 | -0.927411064 |
| H | -7.907787473 | -2.069085208 | -0.471950031 |
| C | -6.411158482 | -1.989973987 | -1.968466139 |
| H | -6.689578265 | -1.039957841 | -2.291916159 |
| C | -5.329117058 | -2.619951390 | -2.611473187 |
| C | -4.097681011 | -5.490505112 | -4.054879287 |
| C | -2.653117521 | -5.810338730 | -4.389965313 |
| H | -2.384396721 | -5.308426174 | -5.276055375 |
| H | -2.555476942 | -6.844583806 | -4.567276326 |
| C | -1.734550437 | -5.402426046 | -3.283302234 |
| C | -2.626844495 | -4.586982257 | -2.349720164 |
| C | -5.282182856 | -5.926765503 | -0.536367037 |
| H | -4.475042615 | -6.315217059 | -1.095633077 |
| C | -4.832114108 | -5.784665113 | 0.942700069  |
| H | -4.500177275 | -6.717282546 | 1.297013099  |
| H | -4.048646246 | -5.086741098 | 1.004869077  |
| H | -5.641641997 | -5.455694456 | 1.526843112  |
| C | -4.565164009 | -1.869932187 | -3.661128260 |
| H | -3.845159676 | -2.517640387 | -4.083871290 |
| C | -3.828973372 | -0.637496244 | -3.060667216 |
| H | -3.424731897 | -0.059532991 | -3.839137274 |
| H | -4.507702826 | -0.057061575 | -2.507429177 |
| H | -3.053433156 | -0.961004829 | -2.429253171 |
| C | -4.781545724 | -4.685969121 | -5.190209369 |
| H | -5.192011540 | -5.351073998 | -5.893050404 |
| H | -5.547071302 | -4.091012134 | -4.786853340 |
| H | -4.073781890 | -4.069945482 | -5.661635425 |
| C | -4.909167861 | -6.742679456 | -3.692252264 |
| H | -4.845731490 | -7.437845373 | -4.477940321 |
| H | -4.524062981 | -7.168999094 | -2.814128197 |
| H | -5.915564832 | -6.479845689 | -3.539392251 |
| C | -0.597310751 | -4.577354718 | -3.828581272 |



|    |              |              |              |
|----|--------------|--------------|--------------|
| H  | -0.093587202 | -4.096082579 | -3.041350214 |
| H  | 0.079848213  | -5.198355296 | -4.341455311 |
| H  | -0.976665459 | -3.854622402 | -4.489838321 |
| C  | -1.371156059 | -6.733807429 | -2.381093168 |
| H  | -1.438739360 | -6.494056268 | -1.362102096 |
| H  | -2.050420126 | -7.500463816 | -2.612632186 |
| H  | -0.392470447 | -7.051149469 | -2.601007183 |
| C  | -6.472594002 | -6.906391603 | -0.637718043 |
| H  | -6.129825260 | -7.888833667 | -0.482165032 |
| H  | -7.190661441 | -6.668072502 | 0.091326010  |
| H  | -6.907293903 | -6.838488902 | -1.591822110 |
| C  | -5.495505149 | -1.381770096 | -4.770503340 |
| H  | -4.930678858 | -1.133286716 | -5.621334397 |
| H  | -6.184509432 | -2.135716895 | -5.018753358 |
| H  | -6.020782044 | -0.531643818 | -4.442677314 |
| Ag | -1.115278492 | 1.721717508  | -1.362254097 |
| Ag | -3.665769880 | 2.028307947  | -0.050969001 |
| P  | -2.261470962 | 3.818937959  | -0.814998058 |
| N  | -2.056784409 | 5.686603542  | -2.823930201 |
| C  | -0.893432535 | 6.286466224  | -2.165376152 |
| C  | -1.116646542 | 7.183442987  | -1.111748075 |
| C  | 0.012867813  | 7.758591769  | -0.493775032 |
| H  | -0.118826487 | 8.422405892  | 0.298366025  |
| C  | 1.335385106  | 7.451941649  | -0.927135061 |
| H  | 2.162958008  | 7.889613939  | -0.472097031 |
| C  | 1.482962063  | 6.554279549  | -1.968981139 |
| H  | 2.444876854  | 6.321420498  | -2.293336164 |
| C  | 0.396167804  | 5.931695107  | -2.611656187 |
| C  | -2.707505877 | 6.299397517  | -4.051846287 |
| C  | -3.706289913 | 5.207443666  | -4.386797314 |
| H  | -3.406088496 | 4.724725222  | -5.273483378 |
| H  | -4.651266492 | 5.639472635  | -4.563132323 |
| C  | -3.811339297 | 4.206688032  | -3.281100232 |
| C  | -2.658810849 | 4.571343381  | -2.347901165 |

|   |              |             |              |
|---|--------------|-------------|--------------|
| C | -2.490692719 | 7.540975298 | -0.533481037 |
| H | -3.230605742 | 7.035960653 | -1.092632076 |
| C | -2.591488046 | 7.079198456 | 0.945306071  |
| H | -3.565070206 | 7.257070169 | 1.300308095  |
| H | -2.378015033 | 6.051862264 | 1.006506076  |
| H | -1.901895080 | 7.615901187 | 1.529449115  |
| C | 0.664016311  | 4.896030629 | -3.662226260 |
| H | -0.256935166 | 4.595865084 | -4.084510292 |
| C | 1.364968475  | 3.642284549 | -3.063366216 |
| H | 1.663325370  | 3.004271204 | -3.842771272 |
| H | 2.207171799  | 3.940079919 | -2.510414176 |
| H | 0.698024083  | 3.131249412 | -2.431907169 |
| C | -1.670034063 | 6.490803891 | -5.188050368 |
| H | -2.041927890 | 7.178891745 | -5.890298417 |
| H | -0.772016551 | 6.856775839 | -4.785268343 |
| H | -1.490111507 | 5.570206773 | -5.660066414 |
| C | -3.387045470 | 7.627647282 | -3.688057264 |
| H | -4.021841561 | 7.920400201 | -4.472929319 |
| H | -3.947856951 | 7.506267674 | -2.809451197 |
| H | -2.656625993 | 8.368281537 | -3.535512249 |
| C | -3.664854953 | 2.809778948 | -3.827493273 |
| H | -3.499193476 | 2.132452739 | -3.040673217 |
| H | -4.541152967 | 2.533410668 | -4.340388310 |
| H | -2.849413837 | 2.778077939 | -4.488957320 |
| C | -5.146374971 | 4.556041935 | -2.378353167 |
| H | -4.904460766 | 4.493880092 | -1.359596093 |
| H | -5.471477432 | 5.527661927 | -2.608805186 |
| H | -5.910387309 | 3.866893737 | -2.598640184 |
| C | -2.745041483 | 9.061607981 | -0.633749045 |
| H | -3.767305685 | 9.255162709 | -0.477500031 |
| H | -2.179552610 | 9.564293347 | 0.095277010  |
| H | -2.469677413 | 9.404855152 | -1.587814111 |
| C | 1.550706916  | 5.459281273 | -4.771779340 |
| H | 1.483468332  | 4.846495368 | -5.623081423 |

|    |             |              |              |
|----|-------------|--------------|--------------|
| H  | 1.241190603 | 6.432859353  | -5.019024360 |
| H  | 2.549782862 | 5.489777017  | -4.444612315 |
| Ag | 2.049632684 | 0.106421298  | -1.360905097 |
| Ag | 3.589767761 | 2.160451999  | -0.047379000 |
| P  | 4.439137373 | 0.049562753  | -0.812732057 |
| N  | 5.952176489 | -1.059254120 | -2.820673199 |
| C  | 5.890189248 | -2.367328415 | -2.162798154 |
| C  | 6.779200623 | -2.623152954 | -1.109888075 |
| C  | 6.712618960 | -3.889238961 | -0.492854033 |
| H  | 7.353678620 | -4.107741290 | 0.298838024  |
| C  | 5.785404109 | -4.880737173 | -0.926366066 |
| H  | 5.750707703 | -5.816542116 | -0.471911031 |
| C  | 4.933717786 | -4.558876918 | -1.967428136 |
| H  | 4.250756813 | -5.275111085 | -2.291834163 |
| C  | 4.937725615 | -3.306124072 | -2.609282187 |
| C  | 6.808080313 | -0.802483587 | -4.049109287 |
| C  | 6.362961812 | 0.608666816  | -4.383392312 |
| H  | 5.794557659 | 0.591100671  | -5.269896377 |
| H  | 7.209909787 | 1.210544917  | -4.559626323 |
| C  | 5.549585952 | 1.199220741  | -3.276853230 |
| C  | 5.288945503 | 0.018036635  | -2.344386163 |
| C  | 7.776328679 | -1.612551030 | -0.531336033 |
| H  | 7.708761475 | -0.718762820 | -1.089740075 |
| C  | 7.427691096 | -1.295547622 | 0.947956069  |
| H  | 8.068847384 | -0.541742886 | 1.303215098  |
| H  | 6.431374217 | -0.966704496 | 1.010170073  |
| H  | 7.547910007 | -2.161611061 | 1.531261113  |
| C  | 3.906399131 | -3.019262800 | -3.659007259 |
| H  | 4.106844282 | -2.071285024 | -4.080768289 |
| C  | 2.470699233 | -2.999622752 | -3.058980215 |
| H  | 1.768341945 | -2.938235677 | -3.837711273 |
| H  | 2.307871330 | -3.878334835 | -2.506673178 |
| H  | 2.362111278 | -2.167073033 | -2.426726170 |
| C  | 6.454130320 | -1.796081956 | -5.185532368 |

|   |             |              |              |
|---|-------------|--------------|--------------|
| H | 7.235864026 | -1.818388899 | -5.887845416 |
| H | 6.321416423 | -2.756835886 | -4.783028341 |
| H | 5.567073990 | -1.490815535 | -5.657356392 |
| C | 8.298018705 | -0.879407967 | -3.685467265 |
| H | 8.868829450 | -0.476228943 | -4.470446319 |
| H | 8.474106191 | -0.333457726 | -2.806757198 |
| H | 8.573570188 | -1.882500940 | -3.533241253 |
| C | 4.266820978 | 1.771822450  | -3.822657271 |
| H | 3.597497887 | 1.966756510  | -3.035821217 |
| H | 4.466355022 | 2.669167276  | -4.334675307 |
| H | 3.831208664 | 1.082383114  | -4.484790319 |
| C | 6.520116130 | 2.178952290  | -2.373098167 |
| H | 6.345580085 | 1.999725983  | -1.354322095 |
| H | 7.523823605 | 1.974202722  | -2.604136187 |
| H | 6.305713829 | 3.185354515  | -2.592334185 |
| C | 9.220282679 | -2.152690620 | -0.632759044 |
| H | 9.899198039 | -1.364371198 | -0.476197031 |
| H | 9.373110179 | -2.894348050 | 0.095602010  |
| H | 9.379396594 | -2.562065410 | -1.587215114 |
| C | 3.949817828 | -4.067887544 | -4.769435338 |
| H | 3.452215199 | -3.702468999 | -5.620066382 |
| H | 4.947465483 | -4.286686741 | -5.017595359 |
| H | 3.476720789 | -4.948498595 | -4.442621317 |

#### Nanocluster 4

325

symmetry c1

|    |              |              |              |
|----|--------------|--------------|--------------|
| Ag | 5.371282000  | -0.494566000 | 0.000965000  |
| Ag | 1.652055000  | -1.971186000 | 1.469469000  |
| Ag | -2.375397000 | -1.859755000 | 1.329927000  |
| Ag | 1.737325000  | -1.145308000 | -1.282117000 |
| Ag | -1.389172000 | 0.821279000  | 1.629562000  |
| Ag | -1.970425000 | -1.470197000 | -1.473494000 |
| Ag | -5.720418000 | -0.255275000 | -0.295772000 |

|    |              |              |              |
|----|--------------|--------------|--------------|
| Ag | -4.899226000 | 2.343879000  | 0.296055000  |
| Ag | -7.449810000 | 1.737219000  | -0.036404000 |
| Ag | -1.172787000 | 1.638612000  | -1.226376000 |
| P  | 6.939501000  | 1.083654000  | -0.849155000 |
| P  | 3.586308000  | -2.065101000 | 0.069904000  |
| P  | -0.369329000 | -1.234530000 | 2.459973000  |
| P  | -4.077784000 | -1.987346000 | -0.367380000 |
| P  | -0.145174000 | -0.175905000 | -2.351436000 |
| P  | -2.544152000 | 2.608898000  | 0.479485000  |
| N  | 7.504044000  | 3.324753000  | 0.631363000  |
| N  | 4.792630000  | -3.770239000 | -1.815561000 |
| N  | -5.911007000 | -4.070334000 | -0.390069000 |
| N  | -0.503719000 | 0.612984000  | -4.998828000 |
| N  | 0.511289000  | -1.733352000 | 5.052103000  |
| N  | -2.773570000 | 5.120451000  | 1.554862000  |
| C  | 8.863005000  | 2.844166000  | 0.784776000  |
| C  | 9.812568000  | 3.107893000  | -0.245518000 |
| C  | 11.142716000 | 2.693857000  | -0.032861000 |
| H  | 11.896976000 | 2.894992000  | -0.809405000 |
| C  | 11.520552000 | 2.019867000  | 1.133560000  |
| H  | 12.569277000 | 1.718607000  | 1.281089000  |
| C  | 10.557254000 | 1.708901000  | 2.101067000  |
| H  | 10.854086000 | 1.141895000  | 2.997102000  |
| C  | 9.212294000  | 2.098346000  | 1.948007000  |
| C  | 7.026999000  | 4.673014000  | 1.139199000  |
| C  | 5.503438000  | 4.549726000  | 0.889148000  |
| H  | 4.999694000  | 4.249225000  | 1.830782000  |
| H  | 5.065353000  | 5.515868000  | 0.569604000  |
| C  | 5.292793000  | 3.437932000  | -0.177357000 |
| C  | 6.580417000  | 2.617100000  | -0.035190000 |
| C  | 9.450905000  | 3.738373000  | -1.589022000 |
| H  | 8.383945000  | 4.031810000  | -1.543957000 |
| C  | 10.288226000 | 4.997423000  | -1.888438000 |
| H  | 9.935923000  | 5.483391000  | -2.821341000 |

|   |              |              |              |
|---|--------------|--------------|--------------|
| H | 11.359325000 | 4.745756000  | -2.033804000 |
| H | 10.232438000 | 5.742238000  | -1.069841000 |
| C | 8.204141000  | 1.644805000  | 2.999977000  |
| H | 7.227555000  | 2.115380000  | 2.769003000  |
| C | 8.005765000  | 0.115307000  | 2.918037000  |
| H | 7.448169000  | -0.253995000 | 3.802976000  |
| H | 8.977653000  | -0.418469000 | 2.893425000  |
| H | 7.441065000  | -0.170113000 | 2.006391000  |
| C | 7.365586000  | 4.855168000  | 2.623861000  |
| H | 7.066470000  | 5.873772000  | 2.941981000  |
| H | 8.455102000  | 4.753761000  | 2.801289000  |
| H | 6.831287000  | 4.127303000  | 3.263219000  |
| C | 7.675596000  | 5.816603000  | 0.341757000  |
| H | 7.292089000  | 6.785591000  | 0.718727000  |
| H | 7.452553000  | 5.758460000  | -0.739871000 |
| H | 8.774725000  | 5.815049000  | 0.474576000  |
| C | 5.258448000  | 4.011010000  | -1.616968000 |
| H | 5.071540000  | 3.203569000  | -2.351327000 |
| H | 6.214589000  | 4.497467000  | -1.893667000 |
| H | 4.447002000  | 4.761595000  | -1.707790000 |
| C | 4.019325000  | 2.623699000  | 0.093116000  |
| H | 3.954013000  | 1.735528000  | -0.567070000 |
| H | 3.119670000  | 3.243245000  | -0.090974000 |
| H | 3.990332000  | 2.264911000  | 1.137763000  |
| C | 3.765125000  | -3.497890000 | -0.963613000 |
| C | 4.657554000  | -5.095439000 | -2.542314000 |
| C | 5.719936000  | -6.101546000 | -2.070590000 |
| H | 5.606468000  | -7.041728000 | -2.646381000 |
| H | 5.616769000  | -6.349423000 | -0.997486000 |
| H | 6.743695000  | -5.718723000 | -2.248625000 |
| C | 9.593906000  | 2.706711000  | -2.732553000 |
| H | 9.522123000  | 3.208353000  | -3.719655000 |
| H | 8.801461000  | 1.934205000  | -2.670782000 |
| H | 10.575310000 | 2.190930000  | -2.688455000 |

|   |              |              |              |
|---|--------------|--------------|--------------|
| C | 8.626210000  | 2.064305000  | 4.421090000  |
| H | 7.835845000  | 1.801827000  | 5.152827000  |
| H | 8.816506000  | 3.153355000  | 4.495573000  |
| H | 9.552552000  | 1.542757000  | 4.739315000  |
| C | -4.619737000 | -3.675491000 | -0.380740000 |
| C | -6.117568000 | -5.569666000 | -0.297745000 |
| C | -4.685255000 | -6.084645000 | -0.565310000 |
| H | -4.456322000 | -6.953063000 | 0.082207000  |
| H | -4.594414000 | -6.427352000 | -1.615906000 |
| C | -3.704074000 | -4.906483000 | -0.300153000 |
| C | -0.234121000 | -0.388456000 | -4.110293000 |
| C | -0.001354000 | -1.708577000 | -4.849919000 |
| C | -0.422569000 | -1.350063000 | -6.304454000 |
| H | 0.222019000  | -1.847549000 | -7.055683000 |
| H | -1.461774000 | -1.694191000 | -6.482646000 |
| C | -0.366767000 | 0.189982000  | -6.442421000 |
| C | 2.818933000  | -4.705293000 | -0.896555000 |
| C | 3.128775000  | -5.468935000 | 0.416977000  |
| H | 2.647110000  | -6.468607000 | 0.405427000  |
| H | 2.747896000  | -4.896133000 | 1.284981000  |
| H | 4.217395000  | -5.610910000 | 0.569845000  |
| C | 5.997403000  | -2.985035000 | -1.970844000 |
| C | 7.072098000  | -3.161400000 | -1.048491000 |
| C | 8.286279000  | -2.485283000 | -1.294502000 |
| H | 9.126451000  | -2.627179000 | -0.596901000 |
| C | 8.442730000  | -1.645207000 | -2.402593000 |
| H | 9.398855000  | -1.128646000 | -2.576692000 |
| C | 7.360068000  | -1.433893000 | -3.264436000 |
| H | 7.472366000  | -0.739115000 | -4.110573000 |
| C | 6.122977000  | -2.080343000 | -3.067308000 |
| C | 3.222835000  | -5.518913000 | -2.153212000 |
| H | 3.164709000  | -6.609117000 | -1.966892000 |
| H | 2.524947000  | -5.288198000 | -2.983868000 |
| C | 4.785440000  | -4.911135000 | -4.059122000 |

|   |               |              |              |
|---|---------------|--------------|--------------|
| H | 4.569921000   | -5.877696000 | -4.557823000 |
| H | 5.809355000   | -4.602205000 | -4.349184000 |
| H | 4.061035000   | -4.165581000 | -4.436758000 |
| C | -0.463464000  | -1.261095000 | 4.229196000  |
| C | -1.554803000  | -0.592267000 | 5.056142000  |
| C | -1.287561000  | -1.151287000 | 6.479575000  |
| H | -1.961273000  | -2.007194000 | 6.689096000  |
| H | -1.489387000  | -0.380187000 | 7.247823000  |
| C | 0.184968000   | -1.637544000 | 6.528039000  |
| C | -1.951116000  | 4.148944000  | 1.101444000  |
| C | -0.489983000  | 4.617660000  | 1.175038000  |
| C | -0.600954000  | 5.838365000  | 2.130462000  |
| H | -0.385844000  | 5.505464000  | 3.167031000  |
| H | 0.130255000   | 6.631309000  | 1.878968000  |
| C | -2.055880000  | 6.359151000  | 2.058209000  |
| C | -7.041294000  | -3.174911000 | -0.324312000 |
| C | -7.712223000  | -2.812347000 | -1.524550000 |
| C | -8.867567000  | -2.009799000 | -1.418211000 |
| H | -9.403428000  | -1.716881000 | -2.333880000 |
| C | -9.342146000  | -1.580004000 | -0.171107000 |
| H | -10.261185000 | -0.976529000 | -0.109672000 |
| C | -8.634098000  | -1.901095000 | 0.995948000  |
| H | -8.983489000  | -1.524967000 | 1.970048000  |
| C | -7.462578000  | -2.686247000 | 0.946530000  |
| C | -6.668843000  | -2.904261000 | 2.223572000  |
| H | -7.282733000  | -3.515253000 | 2.920410000  |
| H | -5.764592000  | -3.501290000 | 2.008447000  |
| C | -6.263917000  | -1.593419000 | 2.933132000  |
| H | -5.350584000  | -1.746589000 | 3.539104000  |
| H | -7.058557000  | -1.218129000 | 3.608603000  |
| H | -6.037544000  | -0.788123000 | 2.200186000  |
| C | -6.632354000  | -5.943596000 | 1.103847000  |
| H | -6.857557000  | -7.028467000 | 1.131777000  |
| H | -7.568172000  | -5.400398000 | 1.341572000  |



|   |              |              |              |
|---|--------------|--------------|--------------|
| H | -5.886425000 | -5.728944000 | 1.893061000  |
| C | -7.112927000 | -6.076930000 | -1.348197000 |
| H | -7.137465000 | -7.184487000 | -1.305836000 |
| H | -6.815256000 | -5.785956000 | -2.371812000 |
| H | -8.139784000 | -5.707972000 | -1.153229000 |
| C | -2.571923000 | -4.877916000 | -1.342401000 |
| H | -1.958906000 | -5.799077000 | -1.256660000 |
| H | -1.905239000 | -4.004224000 | -1.179491000 |
| H | -2.971831000 | -4.817359000 | -2.374678000 |
| C | -3.087294000 | -5.003810000 | 1.119441000  |
| H | -2.672607000 | -6.019268000 | 1.286129000  |
| H | -3.834077000 | -4.798603000 | 1.912857000  |
| H | -2.263087000 | -4.267582000 | 1.237634000  |
| C | 1.479376000  | -2.135778000 | -4.767651000 |
| H | 1.656707000  | -3.045416000 | -5.378952000 |
| H | 1.760222000  | -2.355682000 | -3.715138000 |
| H | 2.154103000  | -1.338113000 | -5.129601000 |
| C | -0.876690000 | -2.847638000 | -4.291176000 |
| H | -0.759119000 | -3.763261000 | -4.908282000 |
| H | -1.949235000 | -2.562415000 | -4.283663000 |
| H | -0.585304000 | -3.088589000 | -3.248692000 |
| C | 0.973731000  | 0.673483000  | -7.022725000 |
| H | 1.094463000  | 0.288103000  | -8.055114000 |
| H | 1.836823000  | 0.324445000  | -6.422830000 |
| H | 1.003156000  | 1.778707000  | -7.069967000 |
| C | -1.507102000 | 0.732915000  | -7.310067000 |
| H | -1.338235000 | 0.435544000  | -8.364519000 |
| H | -1.549229000 | 1.840039000  | -7.273568000 |
| H | -2.487067000 | 0.328383000  | -6.996338000 |
| C | -0.797466000 | 1.965012000  | -4.602860000 |
| C | 0.265362000  | 2.865289000  | -4.316808000 |
| C | -0.053101000 | 4.197793000  | -3.986569000 |
| H | 0.761633000  | 4.905249000  | -3.766588000 |
| C | -1.381935000 | 4.632943000  | -3.923750000 |

|   |              |              |              |
|---|--------------|--------------|--------------|
| H | -1.612449000 | 5.682676000  | -3.682539000 |
| C | -2.415548000 | 3.716880000  | -4.144909000 |
| H | -3.460270000 | 4.043078000  | -4.059306000 |
| C | -2.153902000 | 2.370008000  | -4.457014000 |
| C | 1.318804000  | -4.372878000 | -0.927913000 |
| H | 0.728923000  | -5.312806000 | -0.919411000 |
| H | 1.046252000  | -3.798873000 | -1.836258000 |
| H | 1.010510000  | -3.772702000 | -0.046011000 |
| C | 6.971526000  | -3.999423000 | 0.220311000  |
| H | 5.980148000  | -4.489117000 | 0.226835000  |
| C | 7.025263000  | -3.087694000 | 1.463006000  |
| H | 7.011108000  | -3.697110000 | 2.390652000  |
| H | 6.163120000  | -2.390029000 | 1.485091000  |
| H | 7.956491000  | -2.484865000 | 1.475578000  |
| C | 4.964474000  | -1.721249000 | -3.990328000 |
| H | 4.108360000  | -2.365808000 | -3.710106000 |
| C | 5.301769000  | -1.942275000 | -5.476952000 |
| H | 4.450883000  | -1.634930000 | -6.119021000 |
| H | 5.537846000  | -2.999124000 | -5.705513000 |
| H | 6.176018000  | -1.331947000 | -5.783394000 |
| C | -2.981261000 | -0.901275000 | 4.567311000  |
| H | -3.689598000 | -0.950961000 | 5.419384000  |
| H | -3.012757000 | -1.880071000 | 4.043140000  |
| H | -3.352069000 | -0.139995000 | 3.854655000  |
| C | -1.285432000 | 0.950298000  | 5.033470000  |
| H | -1.490537000 | 1.364356000  | 4.021799000  |
| H | -0.230732000 | 1.175109000  | 5.285084000  |
| H | -1.939553000 | 1.463547000  | 5.768404000  |
| C | 1.128887000  | -0.658225000 | 7.243187000  |
| H | 0.839923000  | -0.586487000 | 8.310696000  |
| H | 1.089560000  | 0.360262000  | 6.811995000  |
| H | 2.174972000  | -1.019823000 | 7.200945000  |
| C | 0.295212000  | -3.006069000 | 7.216433000  |
| H | 0.020597000  | -2.892863000 | 8.284834000  |

|   |              |              |              |
|---|--------------|--------------|--------------|
| H | 1.329315000  | -3.403099000 | 7.174401000  |
| H | -0.393373000 | -3.745771000 | 6.769059000  |
| C | 1.712031000  | -2.370251000 | 4.578991000  |
| C | 2.876672000  | -1.580554000 | 4.366199000  |
| C | 4.054723000  | -2.233195000 | 3.948704000  |
| H | 4.960610000  | -1.639090000 | 3.761976000  |
| C | 4.084388000  | -3.618030000 | 3.747490000  |
| H | 5.016043000  | -4.108556000 | 3.434133000  |
| C | 2.913385000  | -4.369243000 | 3.902169000  |
| H | 2.934069000  | -5.451522000 | 3.703555000  |
| C | 1.698606000  | -3.766091000 | 4.287434000  |
| C | -0.015110000 | 5.016605000  | -0.244390000 |
| H | 0.984877000  | 5.495963000  | -0.190613000 |
| H | -0.713082000 | 5.720364000  | -0.738359000 |
| H | 0.054926000  | 4.117911000  | -0.892663000 |
| C | 0.484740000  | 3.575860000  | 1.749943000  |
| H | 1.487959000  | 4.033871000  | 1.872163000  |
| H | 0.595840000  | 2.701197000  | 1.075528000  |
| H | 0.148576000  | 3.206969000  | 2.740411000  |
| C | -2.583669000 | 6.785173000  | 3.431957000  |
| H | -2.041660000 | 7.693604000  | 3.764222000  |
| H | -2.422680000 | 5.996973000  | 4.190294000  |
| H | -3.663600000 | 7.030518000  | 3.393428000  |
| C | -2.209262000 | 7.537549000  | 1.081766000  |
| H | -1.557182000 | 8.368844000  | 1.416230000  |
| H | -3.250516000 | 7.911860000  | 1.068658000  |
| H | -1.918975000 | 7.272350000  | 0.047880000  |
| C | -4.213934000 | 4.989768000  | 1.579811000  |
| C | -4.834457000 | 4.370598000  | 2.702837000  |
| C | -6.242869000 | 4.312468000  | 2.737689000  |
| H | -6.737693000 | 3.842853000  | 3.601496000  |
| C | -7.022257000 | 4.818226000  | 1.691384000  |
| H | -8.120736000 | 4.767646000  | 1.743912000  |
| C | -6.393856000 | 5.354843000  | 0.562069000  |

|   |              |              |              |
|---|--------------|--------------|--------------|
| H | -7.004865000 | 5.706788000  | -0.283090000 |
| C | -4.988330000 | 5.439669000  | 0.472377000  |
| C | -7.164251000 | -3.156278000 | -2.905228000 |
| H | -6.339619000 | -3.884339000 | -2.769955000 |
| C | -6.539878000 | -1.901513000 | -3.545997000 |
| H | -5.945205000 | -2.169597000 | -4.444023000 |
| H | -5.862073000 | -1.404299000 | -2.823701000 |
| H | -7.316446000 | -1.169219000 | -3.851247000 |
| C | 1.721680000  | 2.426974000  | -4.248804000 |
| H | 1.757362000  | 1.349869000  | -4.509658000 |
| C | 2.635747000  | 3.202857000  | -5.217120000 |
| H | 3.690895000  | 2.881530000  | -5.092721000 |
| H | 2.595344000  | 4.294359000  | -5.020389000 |
| H | 2.357236000  | 3.048381000  | -6.277263000 |
| C | -3.338476000 | 1.412866000  | -4.508776000 |
| H | -2.958531000 | 0.411833000  | -4.799049000 |
| C | -4.417888000 | 1.849744000  | -5.518455000 |
| H | -5.206173000 | 1.073166000  | -5.599784000 |
| H | -4.003223000 | 2.029374000  | -6.529440000 |
| H | -4.916399000 | 2.786074000  | -5.191148000 |
| C | 8.071809000  | -5.093733000 | 0.298602000  |
| H | 7.669656000  | -6.038383000 | 0.717776000  |
| H | 8.908443000  | -4.777191000 | 0.955000000  |
| H | 8.505038000  | -5.327937000 | -0.693780000 |
| C | 4.516252000  | -0.264843000 | -3.770641000 |
| H | 3.592921000  | -0.053738000 | -4.346575000 |
| H | 5.297724000  | 0.455037000  | -4.092669000 |
| H | 4.292792000  | -0.070072000 | -2.702465000 |
| C | 2.875405000  | -0.060940000 | 4.507720000  |
| H | 1.875216000  | 0.235575000  | 4.880521000  |
| C | 3.934926000  | 0.428920000  | 5.510480000  |
| H | 3.859072000  | 1.526908000  | 5.653440000  |
| H | 4.958202000  | 0.213023000  | 5.141502000  |
| H | 3.829567000  | -0.054285000 | 6.501480000  |

|   |              |              |              |
|---|--------------|--------------|--------------|
| C | 0.427986000  | -4.613260000 | 4.288131000  |
| H | -0.399641000 | -3.980034000 | 4.666527000  |
| C | 0.048456000  | -5.026922000 | 2.851256000  |
| H | -0.917136000 | -5.572115000 | 2.854356000  |
| H | 0.812217000  | -5.698267000 | 2.406956000  |
| H | -0.056811000 | -4.138679000 | 2.195919000  |
| C | -4.058336000 | 3.667901000  | 3.814403000  |
| H | -2.974014000 | 3.830519000  | 3.636413000  |
| C | -4.412128000 | 4.200050000  | 5.217664000  |
| H | -3.796219000 | 3.693437000  | 5.989629000  |
| H | -5.475235000 | 4.002476000  | 5.466160000  |
| H | -4.248793000 | 5.291049000  | 5.309265000  |
| C | -4.386727000 | 5.928366000  | -0.838641000 |
| H | -3.283892000 | 5.931096000  | -0.732094000 |
| C | -4.727540000 | 4.947437000  | -1.975277000 |
| H | -4.323307000 | 5.323153000  | -2.935841000 |
| H | -5.824194000 | 4.831659000  | -2.095405000 |
| H | -4.295872000 | 3.943349000  | -1.780250000 |
| C | -8.223314000 | -3.781633000 | -3.831143000 |
| H | -7.758995000 | -4.119260000 | -4.780545000 |
| H | -9.010847000 | -3.046348000 | -4.096885000 |
| H | -8.724504000 | -4.652386000 | -3.363859000 |
| C | 2.239394000  | 2.565044000  | -2.807892000 |
| H | 3.271601000  | 2.176541000  | -2.735253000 |
| H | 1.609050000  | 1.992154000  | -2.097972000 |
| H | 2.255400000  | 3.626953000  | -2.486550000 |
| C | -3.959239000 | 1.286107000  | -3.104552000 |
| H | -4.851488000 | 0.635199000  | -3.126463000 |
| H | -4.276452000 | 2.270580000  | -2.704576000 |
| H | -3.243062000 | 0.848273000  | -2.378492000 |
| C | 3.071779000  | 0.633296000  | 3.145904000  |
| H | 3.082341000  | 1.734762000  | 3.280832000  |
| H | 2.252994000  | 0.384095000  | 2.439050000  |
| H | 4.031743000  | 0.335746000  | 2.670138000  |

|   |              |              |              |
|---|--------------|--------------|--------------|
| C | 0.547598000  | -5.860799000 | 5.184140000  |
| H | -0.406242000 | -6.427467000 | 5.187136000  |
| H | 0.798435000  | -5.604568000 | 6.231743000  |
| H | 1.334989000  | -6.549002000 | 4.812787000  |
| C | -4.857546000 | 7.350151000  | -1.209753000 |
| H | -4.255029000 | 7.753854000  | -2.049684000 |
| H | -4.778410000 | 8.056697000  | -0.360503000 |
| H | -5.917354000 | 7.347003000  | -1.538912000 |
| C | -4.316983000 | 2.147618000  | 3.748957000  |
| H | -3.733771000 | 1.625113000  | 4.531496000  |
| H | -4.032321000 | 1.730878000  | 2.760371000  |
| H | -5.388426000 | 1.915227000  | 3.918772000  |

**S9. TGA plot of  $[(\text{Me}_2\text{-cAAC=P})_6(\text{Ag})_{10}](\text{NTf}_2)_2$  (**4**)**

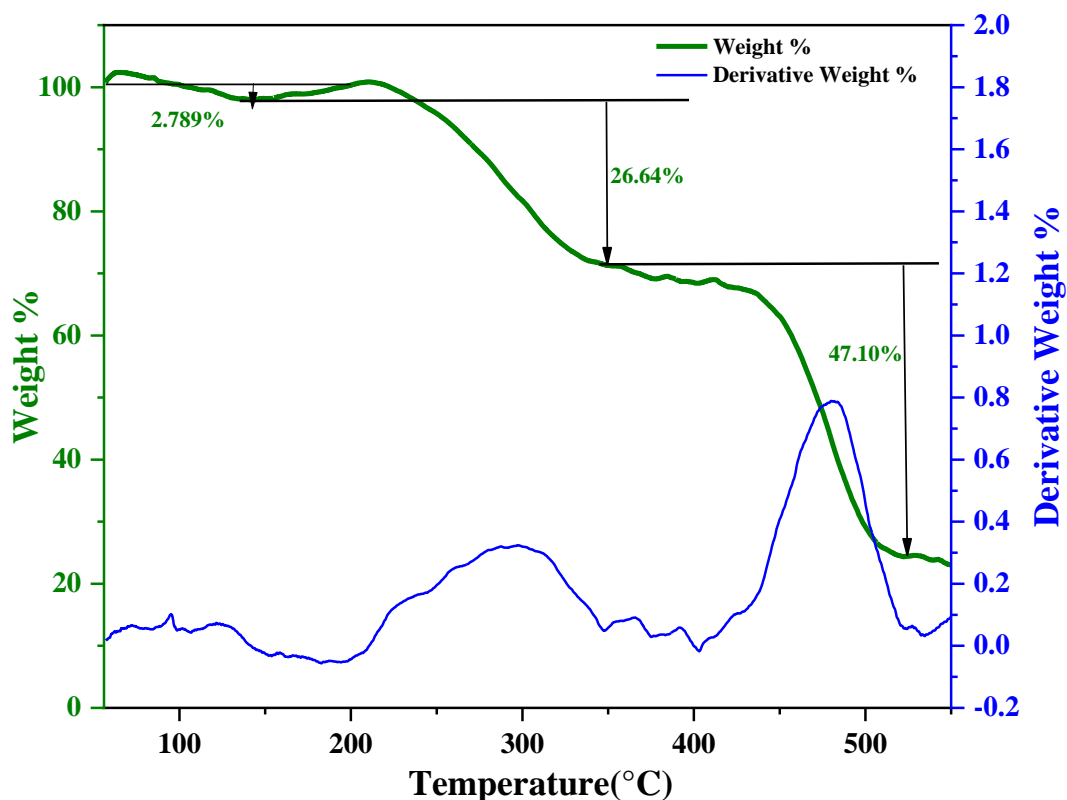

**Figure S14.** Thermogravimetric analysis (TGA) curve of  $[(\text{Me}_2\text{-cAAC=P})_6(\text{Ag})_{10}](\text{NTf}_2)_2$  (**4**).

## S10. X-ray photoelectron spectroscopy (XPS) Analyses under Inert Atmosphere

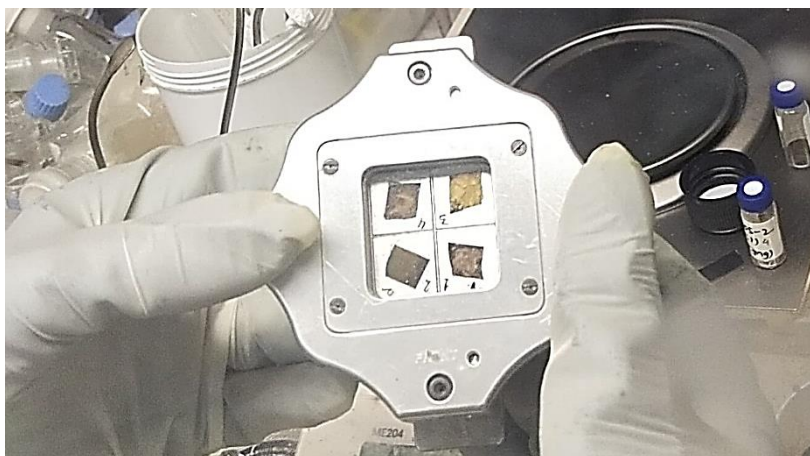

**Figure S15.** Sample preparation for the XPS studies.

### S10.1. XPS data of $[(\text{Me}_2\text{-cAAC}=\text{P})_6(\text{Ag})_{12}(\text{Cl})_3]$ (**2**)

The high-resolution X-ray Photo-electron Spectroscopy (XPS) deconvolution illustrated in Figures S16-S17 offer comprehensive insights into the Ag3d region of NCs **2**, **4**. The analysis of **2** indicates distinct peaks at 367.96 eV, 368.81 eV, 373.95 eV, and 374.76 eV, which correspond to core-level transitions of Ag 3d. The peaks at 367.96 eV and 368.81 eV are attributed to the Ag3d<sub>5/2</sub> orbital, while those at 373.95 eV and 374.76 eV are associated with the Ag3d<sub>3/2</sub> orbital, exhibiting a spin-orbit splitting of approximately 6 eV. The peaks at 368.81 eV and 374.76 eV correspond to Ag<sup>0</sup>, whereas the peaks at 367.96 eV and 373.94 eV are indicative of Ag<sup>I</sup>.<sup>18-20</sup> These binding energy values suggest the presence of both Ag<sup>+</sup> and Ag<sup>0</sup> states within the samples of  $[(\text{Me}_2\text{-cAAC}=\text{P})_6(\text{Ag})_{12}(\text{Cl})_3]$  (**2**).

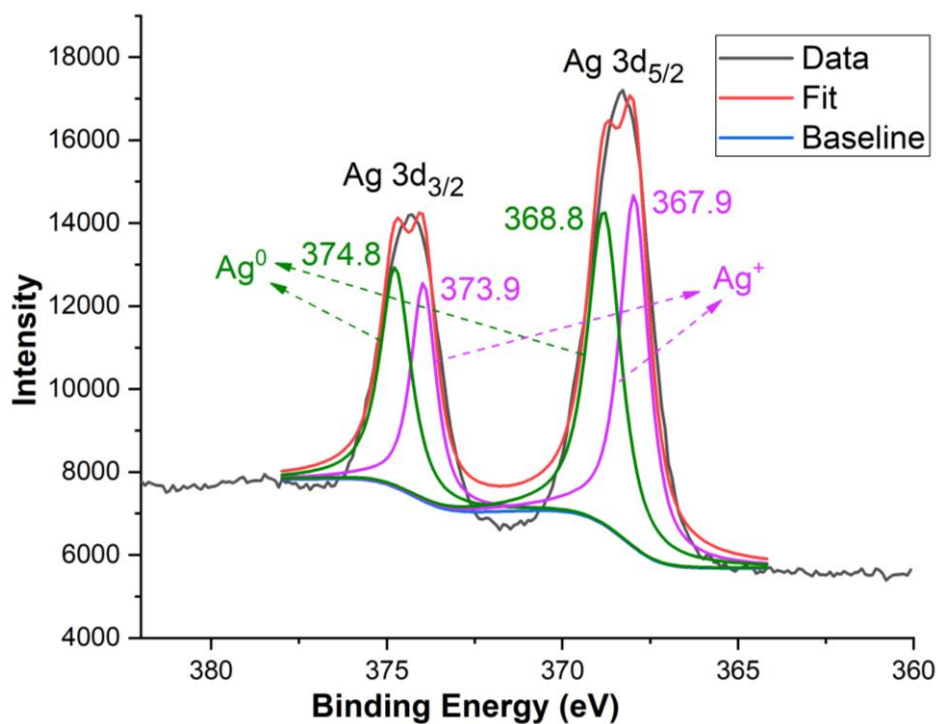

**Figure S16.** Ag3d high-depth deconvolution spectra of  $[(\text{Me}_2\text{-cAAC}=\text{P})_6(\text{Ag})_{12}(\text{Cl})_3]$  (2).

**S10.2. XPS data of  $[(\text{Me}_2\text{-cAAC}=\text{P})_6(\text{Ag})_{10}](\text{NTf}_2)_2$  (4)**

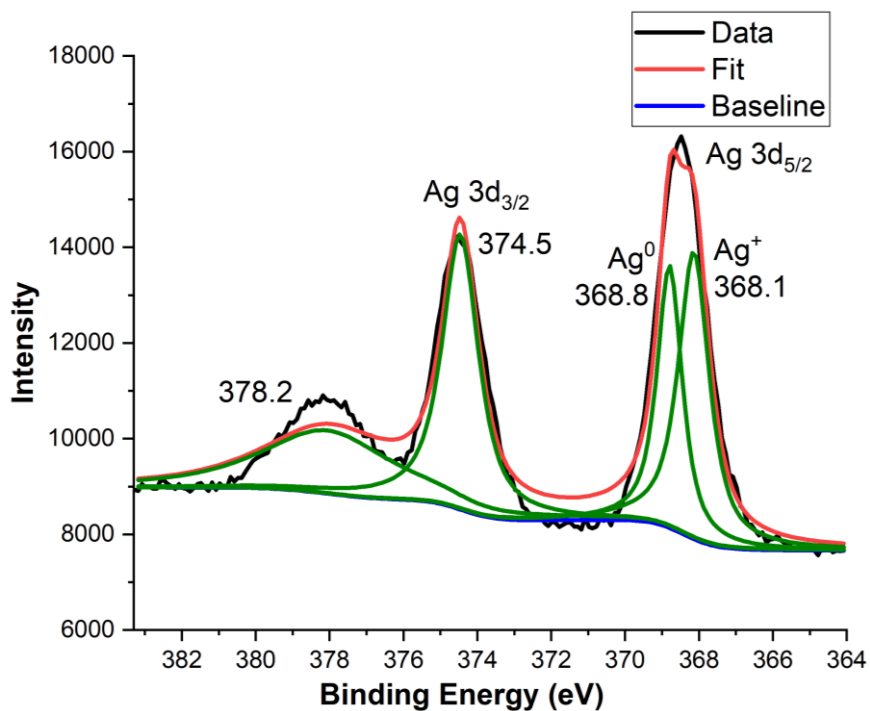

**Figure S17.** Ag3d high-depth deconvolution spectra of  $[(\text{Me}_2\text{-cAAC}=\text{P})_6(\text{Ag})_{10}](\text{NTf}_2)_2$  (4).



## S11. References

1. V. Lavallo, Y. Canac, C. Präsang, B. Donnadiu and G. Bertrand, *Angew. Chem. Int. Ed.*, 2005, **44**, 5705–5709.
2. S. Roy, K. C. Mondal, S. Kundu, B. Li, C. J. Schürmann, S. Dutta, D. Koley, R. Herbstlirmer, D. Stalke and H. W. Roesky, *Chem. Eur. J.*, 2017, **23**, 12153–12157.
3. A. Kulkarni, S. Arumugam, M. Francis, P. G. Reddy, E. Nag, G. Sai, K. C. Mondal and S. Roy, *Chem. Eur. J.*, 2021, **27**, 200–206.
4. E. Nag, S. Battuluri, S. B. Bini and S. Roy, *Inorg. Chem.*, 2022, **61**, 13007–13014.
5. Bruker (2021). *APEX4, SAINT and SADABS*. Bruker AXS Inc., Madison, Wisconsin, USA.
6. G. M. Sheldrick, *Acta Cryst.* 2015, **71**, 3-8.
7. C. B. Hübschle, G. M. Sheldrick and B. Dittrich, *J. Appl. Cryst.* 2011, **44**, 1281-1284.
8. A. D. Becke, *Phys. Rev. A*, 1988, **38**, 3098–3100.
9. J. P. Perdew, *Phys. Rev. B*, 1986, **33**, 8822–8824.
10. S. Grimme, S. Ehrlich and L. Goerigk, *J. Comput. Chem.*, 2011, **32**, 1456–1465.
11. S. Grimme, J. Antony, S. Ehrlich and H. Krieg, *J. Chem. Phys.*, 2010, **132**, 154104-154124.
12. F. Weigend and R. Ahlrichs, *Phys. Chem. Chem. Phys.*, 2005, **7**, 3297–3305.
13. Gaussian 09, Revision A.02, M. J. Frisch, G. W. Trucks, H. B. Schlegel, G. E. Scuseria, M. A. Robb, J. R. Cheeseman, G. Scalmani, V. Barone, G. A. Petersson, H. Nakatsuji, X. Li, M. Caricato, A. Marenich, J. Bloino, B. G. Janesko, R. Gomperts, B. Mennucci, H. P. Hratchian, J. V. Ortiz, A. F. Izmaylov, J. L. Sonnenberg, D. Williams-Young, F. Ding, F. Lipparini, F. Egidi, J. Goings, B. Peng, A. Petrone, T. Henderson, D. Ranasinghe, V. G. Zakrzewski, J. Gao, N. Rega, G. Zheng, W. Liang, M. Hada, M. Ehara, K. Toyota, R. Fukuda, J. Hasegawa, M. Ishida, T. Nakajima, Y. Honda, O. Kitao, H. Nakai, T. Vreven, K. Throssell, J. A. Montgomery, Jr., J. E. Peralta, F. Ogliaro, M. Bearpark, J. J. Heyd, E. Brothers, K. N. Kudin, V. N. Staroverov, T. Keith, R. Kobayashi, J. Normand, K. Raghavachari, A. Rendell, J. C. Burant, S. S. Iyengar, J. Tomasi, M. Cossi, J. M. Millam, M. Klene, C. Adamo, R. Cammi, J. W. Ochterski, R. L.

- Martin, K. Morokuma, O. Farkas, J. B. Foresman, and D. J. Fox, Gaussian, Inc., Wallingford CT, 2016.
14. A. E. Reed, L. A. Curtiss and F. Weinhold, *Chem. Rev.*, 1988, **88**, 899–926.
  15. A. E. Reed, R. B. Weinstock and F. Weinhold, *J. Chem. Phys.*, 1985, **83**, 735–746.
  16. K. B. Wiberg, *Tetrahedron*, 1968, **24**, 1083–1096.
  17. E. D. Glendening, C. R. Landis and F. Weinhold, *J. Comput. Chem.*, 2013, **34**, 1429–1437.
  18. M. H. Azarian, S. Nijpanich, N. Chanlek and W. Sutapun, *RSC Adv.*, 2024, **14**, 14624–14639.
  19. N. Li, G. Fan, M. Fan, F. Wu, G. Zhang and D. Fan, *Dalton Trans.*, 2021, **50**, 15602–15611.
  20. NIST X-ray Photoelectron Spectroscopy Database, <https://srdata.nist.gov/xps/QueryByElmType/Ag/PE>, (accessed 6 December 2024).
